1 **TITLE PAGE**

2 **Title**

3 Neural precursors of deliberate and arbitrary decisions in the study of voluntary action

4  
5 **Authors**

6 U. Maoz<sup>1,2,3\*</sup>, G. Yaffe<sup>4</sup>, C. Koch<sup>5</sup>, L. Mudrik<sup>6</sup>

7  
8 **Affiliations**

9 <sup>1</sup> Department of Psychology and Brain Institute, Chapman University, Orange, CA, USA.

10 <sup>2</sup> Department of Psychology, University of California, Los Angeles, CA, USA.

11 <sup>3</sup> Division of Humanities and Social Sciences, California Institute of Technology, Pasadena, CA, USA.

12 <sup>4</sup> Yale Law School, Yale University, New Haven, CT, USA.

13 <sup>5</sup> Allen Institute for Brain Science, Seattle, WA, USA.

14 <sup>6</sup> School of Psychological Science and Sagol School of Neuroscience, Tel Aviv University, Tel Aviv, Israel.

15 \* [maoz@chapman.edu](mailto:maoz@chapman.edu)

16  
17 **Abstract**

18 The readiness potential (RP)—a key ERP correlate of upcoming action—is known to precede  
19 subjects' reports of their decision to move. Some view this as evidence against a causal role for  
20 consciousness in human decision-making and thus against free-will. Yet those studies focused  
21 on arbitrary decisions—purposeless, unreasoned, and without consequences. It remains  
22 unknown to what degree the RP generalizes to deliberate, more ecological decisions. We  
23 directly compared deliberate and arbitrary decision-making during a \$1000-donation task to  
24 non-profit organizations. While we found the expected RPs for arbitrary decisions, they were  
25 strikingly absent for deliberate ones. Our results and drift-diffusion model are congruent with  
26 the RP representing accumulation of noisy, random fluctuations that drive arbitrary—but not  
27 deliberate—decisions. They further point to different neural mechanisms underlying deliberate  
28 and arbitrary decisions, challenging the generalizability of studies that argue for no causal role  
29 for consciousness in decision-making to real-life decisions.

30

31

## 32 **Significance Statement**

33 The extent of human free will has been debated for millennia. Previous studies demonstrated  
34 that neural precursors of action—especially the readiness potential—precede subjects' reports  
35 of deciding to move. Some viewed this as evidence against free-will. However, these  
36 experiments focused on arbitrary decisions—e.g., randomly raising the left or right hand. We  
37 directly compared deliberate (actual \$1000 donations to NPOs) and arbitrary decisions, and  
38 found readiness potentials before arbitrary decisions, but—critically—not before deliberate  
39 decisions. This supports the interpretation of readiness potentials as byproducts of  
40 accumulation of random fluctuations in arbitrary but not deliberate decisions and points to  
41 different neural mechanisms underlying deliberate and arbitrary choice. Hence, it challenges  
42 the generalizability of previous results from arbitrary to deliberate decisions.

43

## 44 MAIN TEXT

### 45 Introduction

46 Humans typically experience freely selecting between alternative courses of action, say, when  
47 ordering a particular item off a restaurant menu. Yet a series of human studies using  
48 electroencephalography (EEG) (Haggard & Eimer, 1999; Libet, Gleason, Wright, & Pearl,  
49 1983; Salvaris & Haggard, 2014), fMRI (Bode & Haynes, 2009; Bode et al., 2011; Soon,  
50 Brass, Heinze, & Haynes, 2008; Soon, He, Bode, & Haynes, 2013), intracranial (Perez et al.,  
51 2015), and single-cell recordings (Fried, Mukamel, & Kreiman, 2011) challenged the validity  
52 of this common experience. These studies found neural correlates of decision processes  
53 hundreds of milliseconds and even seconds prior to the moment that subjects reported having  
54 consciously decided. The seminal research that launched this series of studies was conducted  
55 by Benjamin Libet and colleagues (Libet, Gleason, Wright, & Pearl, 1983). There, the authors  
56 showed that the readiness potential (RP)—a ramp-up in EEG negativity before movement  
57 onset, thought to originate from the presupplementary motor area (pre-SMA)—begins before  
58 subjects report a conscious decision to act. Some have claimed, following these and other  
59 findings, that the subjective human experience of freely deciding is but an illusion, because  
60 human actions are unconsciously initiated before the conscious decision to act (Harris, 2012;  
61 Libet et al., 1983; Wegner, 2002). This debate has been captivating scholars from many  
62 disciplines in and outside of academia (C. Frith, Blakemore, & Wolpert, 2000; C. D. Frith &  
63 Haggard, 2018; Haggard, 2008; Jeannerod, 2006; Lau, Rogers, Haggard, & Passingham, 2004;  
64 Mele, 2006; Wegner, 2002).

65 Critically, in the above studies, subjects were told to arbitrarily move their right hand or flex  
66 their right wrist; or they were instructed to arbitrarily move either the right or left hand  
67 (Haggard, 2008; Hallett, 2016; Roskies, 2010). Thus, their decisions were always unreasoned,  
68 purposeless, and bereft of any real consequence. This stands in sharp contrast to many real-life  
69 decisions that are deliberate—i.e., reasoned, purposeful, and bearing consequences (Ullmann-  
70 Margalit & Morgenbesser, 1977): which clothes to wear, what route to take to work, as well as  
71 more formative decisions about life partners, career choices, and so on.

72 Deliberate decisions have been widely studied in the field of neuroeconomics (Kable &  
73 Glimcher, 2009; Sanfey, Loewenstein, McClure, & Cohen, 2006) and in perceptual tasks (Gold  
74 & Shadlen, 2007). Yet, interestingly, little has been done in that field to assess the relation  
75 between decision-related activity, subjects' conscious experience of deciding, and the neural  
76 activity instantaneously contributing to this experience. Though some studies compared, for  
77 example, internally driven and externally cued decisions (Thut et al., 2000; Wisniewski,  
78 Goschke, & Haynes, 2016), or stimulus-based and intention-based actions (Waszak et al.,  
79 2005), these were typically arbitrary decisions and actions with no real implications. Therefore,  
80 the results of these studies provide no direct evidence about potential differences between  
81 arbitrary and deliberate decisions.

82 Such direct comparisons are critical for the free will debate, because it is deliberate, rather than  
83 arbitrary, decisions that are at the center of philosophical arguments about free will and moral  
84 responsibility (Breitmeyer, 1985; Roskies, 2010). Deliberate decisions typically involve more  
85 conscious and lengthy deliberation and might thus be more tightly bound to conscious  
86 processes than arbitrary ones. Thus, one could speculate that different findings might be  
87 obtained when inspecting the RP in arbitrary compared to deliberate decisions.

88 A further reason to expect such differences stems from a recent computational model, which  
89 challenged the claim that the RP represents a genuine marker of unconscious decisions. Rather,

90 the model suggested that the RP might reflect the artificial accumulation, up to a threshold, of  
91 stochastic fluctuations in neural activity. In the model, crossing the threshold directly leads to  
92 action (Schurger, Sitt, & Dehaene, 2012). Such stochastic fluctuations are expected to be the  
93 sole driver of arbitrary decisions; while it is the values of the decision alternatives that drive  
94 deliberate decisions. Therefore, the model appears to predict no RP for deliberate decisions.

95 Demonstrating no, or considerably diminished, RP in deliberate decisions would challenge the  
96 interpretation of the RP as a general index of internal decision-making. More critically, it  
97 would question the generalizability of studies focused on arbitrary decisions to everyday,  
98 ecological, deliberate decisions.

99 Here, we tested this prediction and directly compared the neural precursors of deliberate and  
100 arbitrary decisions—and in particular the RP—on the same subjects, in an EEG experiment.  
101 Our experiment utilized a donation-preference paradigm, in which a pair of non-profit  
102 organizations (NPOs) were presented in each trial. In deliberate-decision trials, subjects chose  
103 to which NPO they would like to donate \$1000. In arbitrary-decision trials, both NPOs  
104 received an equal donation of \$500, irrespective of subjects' key presses (Fig. 1). In both  
105 conditions, subjects were instructed to report their decisions as soon as they made them, and  
106 their hands were placed on the response keys, to make sure they could do so as quickly as  
107 possible. Notably, while the visual inputs and motor outputs were identical between deliberate  
108 and arbitrary decisions, the decisions' meaning for the subjects was radically different: in  
109 deliberate blocks, the decisions were meaningful and consequential—reminiscent of important,  
110 real-life decisions—while in arbitrary blocks, the decisions were meaningless and bereft of  
111 consequences—mimicking previous studies of volition.

112

## 113 **Results**

### 114 *Behavioral Results*

115 Subjects' reaction times (RTs) were analyzed using a 2-way ANOVA along decision  
116 type (arbitrary/deliberate) and difficulty (easy/hard). This was carried out on log-  
117 transformed data (raw RTs violated the normality assumption;  $W=0.94$ ,  $p=0.001$ ).  
118 As expected, subjects were substantially slower for deliberate ( $M=2.33$ ,  $SD=0.51$ )  
119 than for arbitrary ( $M=0.99$ ,  $SD=0.32$ ) decisions (Fig. 2, left;  $F(1,17)=126.11$ ,  
120  $p<0.0001$  for the main effect of decision type). A main effect of decision difficulty  
121 was also found  $F(1,17)=18.76$ ,  $p=0.0004$ , with difficult decisions ( $M=1.77$ ,  
122  $SD=0.40$ ) being slower than easy ones ( $M=1.56$ ,  $SD=0.28$ ). Importantly, subjects  
123 were slower for hard ( $M=2.52$ ,  $SD=0.62$ ) vs. easy ( $M=2.13$ ,  $SD=0.44$ ) decisions in  
124 the deliberate case (hard vs. easy deliberate decisions:  $t(17)=4.78$ ,  $p=0.0002$ ), yet  
125 not for the arbitrary case ( $M=1.00$ ,  $SD=0.34$ ;  $M=0.98$ ,  $SD=0.32$ , for hard and easy  
126 arbitrary decisions, respectively;  $t(17)=1.01$ ,  $p=0.33$ ;  $F(1,17)=20.12$ ,  $p=0.0003$  for  
127 the interaction between decision type and decision difficulty). This validates our  
128 experimental manipulation and further demonstrates that, in deliberate decisions,  
129 subjects were making meaningful decisions, affected by the difference in the values  
130 of the two NPOs, while for arbitrary decisions they were not. What is more, the  
131 roughly equal RTs between easy and hard arbitrary decisions provide evidence  
132 inconsistent with concerns that subjects were deliberating during arbitrary decisions.

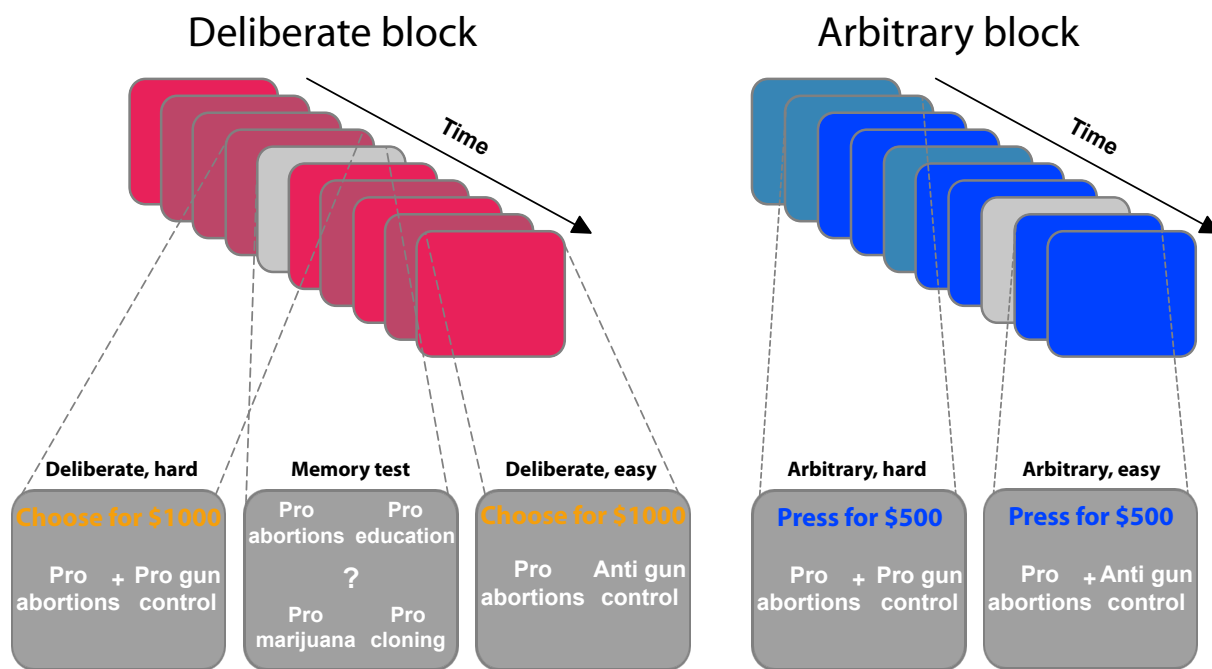

133

134 **Figure 1: Experimental paradigm.** The experiment included deliberate (red, left panel) and  
135 arbitrary (blue, right panel) blocks, each containing nine trials. In each trial, two causes—  
136 reflecting NPO names—were presented, and subjects were asked to either choose to which  
137 NPO they would like to donate (deliberate), or to simply press either right or left, as both NPOs  
138 would receive an equal donation (arbitrary). They were specifically instructed to respond as  
139 soon as they reached a decision, in both conditions. Within each block, some of the trials were  
140 easy (lighter colors) decisions, where the subject's preferences for the two NPOs substantially  
141 differed (based on a previous rating session), and some were hard decisions (darker colors),  
142 where the preferences were more similar; easy and hard trials were randomly intermixed within  
143 each block. To make sure subjects were paying attention to the NPO names, even in arbitrary  
144 trials, and to better equate the cognitive load between deliberate and arbitrary trials, memory  
145 tests (in light grey) were randomly introduced. There, subjects were asked to determine which  
146 of four NPO names appeared in the immediately previous trial. For a full list of NPOs and  
147 causes see Supplementary Table 1.

148 The consistency between subjects' choices throughout the main experiment and the NPO  
149 ratings they gave prior to the main experimental session was also analyzed using a 2-way  
150 ANOVA (see Methods). As expected, subjects were highly consistent with their own, previous  
151 ratings when making deliberate decisions ( $M=0.91$ ,  $SD=0.04$ ), but not when making arbitrary  
152 ( $M=0.52$ ,  $SD=0.04$ ) ones (Fig. 2, right;  $F(1,17)=946.55$ ,  $p<0.0001$ ) for the main effect of  
153 decision type. A main effect of decision difficulty was also found ( $F(1,17)=57.39$ ,  $p<0.0001$ ),  
154 with hard decisions evoking less consistent scores ( $M=0.66$ ,  $SD=0.05$ ) than easy ones  
155 ( $M=0.76$ ,  $SD=0.03$ ). Again, decision type and decision difficulty interacted ( $F(1,17)=25.96$ ,  
156  $p<0.0001$ ): subjects were much more consistent with their choices in easy ( $M=0.99$ ,  $SD=0.02$ )  
157 vs. hard ( $M=0.83$ ,  $SD=0.04$ ) deliberate decisions ( $t(17)=11.15$ ,  $p<0.0001$ ), than they were in  
158 easy ( $M=0.54$ ,  $SD=0.07$ ) vs. hard ( $M=0.49$ ,  $SD=0.05$ ) arbitrary decisions ( $t(17)=2.50$ ,  
159  $p=0.028$ ). Nevertheless, though subjects were around chance (i.e., 0.5) in their consistency in  
160 arbitrary decisions (ranging between 0.39 and 0.64), it seems that some subjects were slightly  
161 influenced by their preferences in easy-arbitrary decisions trials, resulting in the significant  
162 difference between hard-arbitrary and easy-arbitrary decisions above. Finally, no differences  
163 were found between subjects' tendency to press the right vs. left key in the different conditions  
164 (both main effects and interaction:  $F<1$ ).

165

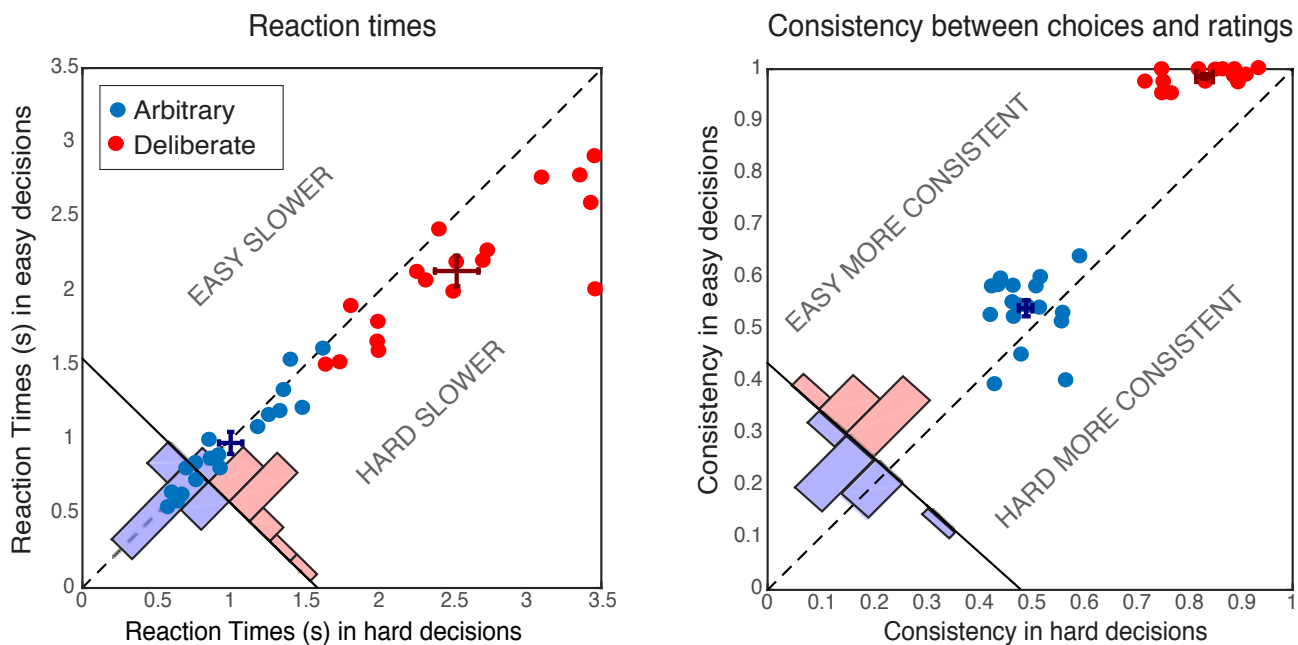

166

167 **Figure 2: Behavioral results.** Reaction Times (RTs; left) and Consistency Grades (CG; right)  
168 in arbitrary (blue) and deliberate (red) decisions. Each dot represents the average RT/CG for  
169 easy and hard decisions for an individual subject (hard decisions: x-coordinate; easy decisions:  
170 y-coordinate). Group means and SEs are represented by dark red and dark blue crosses. The red  
171 and blue histograms at the bottom-left corner of each plot sum the number of red and blue dots  
172 with respect to the solid diagonal line. The dashed diagonal line represents equal RT/CG for  
173 easy and hard decisions; data points below that diagonal indicate longer RTs or higher CGs for  
174 hard decisions. In both measures, arbitrary decisions are more centered around the diagonal  
175 than deliberate decisions, showing no or substantially reduced differences between easy and  
176 hard decisions.

177 EEG Results: Readiness Potential (RP)

178 The RP is generally held to index unconscious readiness for upcoming movement (Haggard,  
179 2008; Kornhuber & Deecke, 1990; Libet et al., 1983; Shibasaki & Hallett, 2006); although  
180 more recently, alternative interpretations of the RP have been suggested (Miller, Shepherdson,  
181 & Trevena, 2011; Schmidt, Jo, Wittmann, & Hinterberger, 2016; Schurger et al., 2012;  
182 Trevena & Miller, 2010; Verleger, Haake, Baur, & Śmigasiewicz, 2016). It has nevertheless  
183 been the standard component studied in EEG versions of the Libet paradigm (Haggard, 2008;  
184 Haggard & Eimer, 1999; Hallett, 2007; Libet, 1985; Libet et al., 1983; Libet, Wright, &  
185 Gleason, 1982; Miller et al., 2011; Schurger et al., 2012; Shibasaki & Hallett, 2006; Trevena &  
186 Miller, 2010). As is common, we measured the RP over electrode  $C_z$  in the different conditions  
187 by averaging the activity across trials in the 2 s prior to subjects' movement.

188 Focusing on the last 500 ms before movement onset for our statistical tests, we found a clear  
189 RP in arbitrary decisions, yet RP amplitude was not significantly different from 0 in deliberate  
190 decisions (Fig. 3A;  $F(1,17)=11.86$ ,  $p=0.003$ ,  $BF=309.21$  for the main effect of decision type; in  
191 t-tests against 0, corrected for multiple comparisons, an effect was only found for arbitrary  
192 decisions (hard:  $t(17)=5.09$ ,  $p=0.0001$ ,  $BF=307.38$ ; easy:  $t(17)=5.75$ ,  $p<0.0001$ ,  $BF=1015.84$ )  
193 and not for deliberate ones; the Bayes factor—while trending in the right direction—indicated  
194 inconclusive evidence (hard:  $t(17)=1.24$ ,  $p>0.5$ ,  $BF=0.47$ ; easy:  $t(17)=1.84$ ,  $p=0.34$ ,  $BF=0.97$ ).  
195 Our original baseline was stimulus locked (see Methods). And we hypothesized that the  
196 inconclusive Bayes factor for deliberate trials had to do with a constant, slow, negative drift

197 that our model predicted for deliberate trials (see below) rather than reflecting a typical RP. As  
198 the RTs for deliberate trials were longer than for arbitrary ones, this trend might have become  
199 more pronounced for those trials. To test this, we switched the baseline period to -1000 ms  
200 to -500 ms relative to *movement* onset (i.e., a baseline that immediately preceded our time of  
201 interest window). Under this analysis, we found evidence that deliberate decisions (pooled  
202 across decision difficulty) are not different from 0 (BF=0.332), supporting the claim that the  
203 RP during the last 500 ms before response onset was completely absent (BF for similarly  
204 pooled arbitrary decisions was  $5.07 \cdot 10^4$ ).

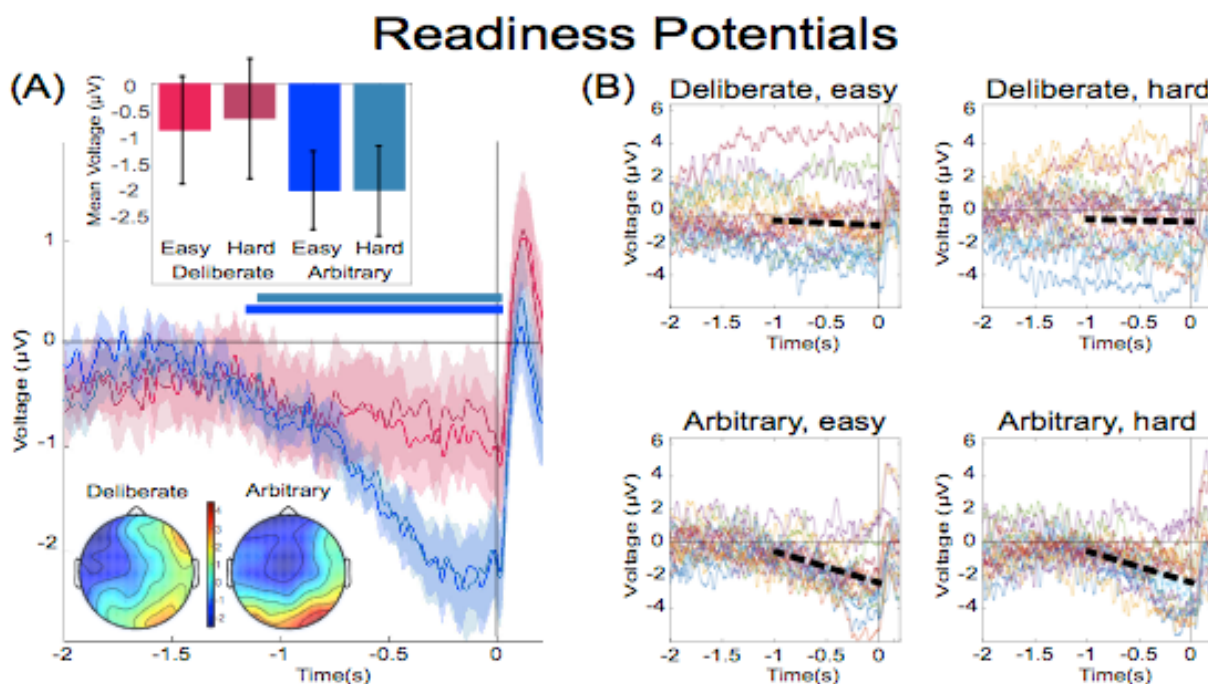

205

206 **Figure 3: The readiness potentials for deliberate and arbitrary decisions.** (A) Mean and SE  
207 of the readiness potential (RP) in deliberate (red shades) and arbitrary (blue shades) easy and  
208 hard decisions in electrode  $C_z$ , as well as scalp distributions. Zero refers to time of right/left  
209 movement, or response, made by the subject. Notably, the RP significantly differs from zero  
210 and displays a typical scalp distribution for arbitrary decisions only. Similarly, temporal  
211 clusters where activity was significantly different from 0 were found for arbitrary decisions  
212 only (horizontal blue lines above the x axis). Bar plot insets and scalp distributions depict the  
213 average activity between -0.5 and 0 s, across subjects. The inset shows the mean amplitude of  
214 the RP, with 95% confidence intervals, over the same time window. Response-locked potentials  
215 with an expanded timecourse, and stimulus-locked potentials are given in Fig. 6B and 6A,  
216 respectively. The same (response-locked) potentials as here, but with a *movement-locked*  
217 *baseline* of -1 to -0.5 s (same as in our Bayesian analysis), are given in Fig. 6C. (B) Individual  
218 subjects'  $C_z$  activity in the four conditions (n=18). The linear-regression line for voltage against  
219 time over the last 1000 ms before response onset is designated by a dashed, black line. The  
220 lines have slopes significantly different from 0 for arbitrary decisions only. Note that the  
221 waveforms converge to an RP only in arbitrary decisions.

222 In an effort to further test for continuous time regions where the RP is different from 0 for  
223 deliberate and arbitrary trials, we ran a cluster-based nonparametric permutation analysis  
224 (Maris & Oostenveld, 2007) for all four conditions against 0. Using the default parameters (see  
225 Methods), we found a prolonged cluster (~1.2s) of activation that reliably differed from 0 in  
226 both arbitrary conditions (designated by horizontal blue-shaded lines above the x axis in Fig.  
227 3A). The same analysis revealed no clusters of activity differing from zero in either of the  
228 deliberate conditions.

229 In a similar manner, regressing voltage against time for the last 1000 ms before response onset,  
230 the downward trend was significant for arbitrary decisions (Fig. 3B;  $p < 0.0001$ ,  $BF > 10^{25}$  for  
231 both easy and hard conditions) but not for deliberate decisions, with the Bayes factor indicating  
232 conclusive evidence for no effect (hard:  $p > 0.5$ ,  $BF = 0.09$ ; easy:  $p = 0.35$ ,  $BF = 0.31$ ; all  
233 Bonferroni corrected for multiple comparisons). Notably, this pattern of results was also  
234 manifested for single-subject analysis (Fig. 4; 14 of the 18 subjects had significant downward  
235 slopes for arbitrary decisions—i.e.,  $p < 0.05$ , Bonferroni corrected for multiple comparisons—  
236 when regressing voltage against time for every trial over the last 1000 ms before response  
237 onset; but only 5 of the 18 subjects had significant downward slopes for the same regression  
238 analysis for deliberate decisions; see Methods. In addition, the average slopes for deliberate  
239 and arbitrary decisions were  $-0.28 \pm 0.25$  and  $-1.9 \pm 0.32$  (mean  $\pm$  SE), respectively, a significant  
240 difference:  $t(17) = 4.55$ ,  $p < 0.001$ ,  $BF = 380.02$ ).

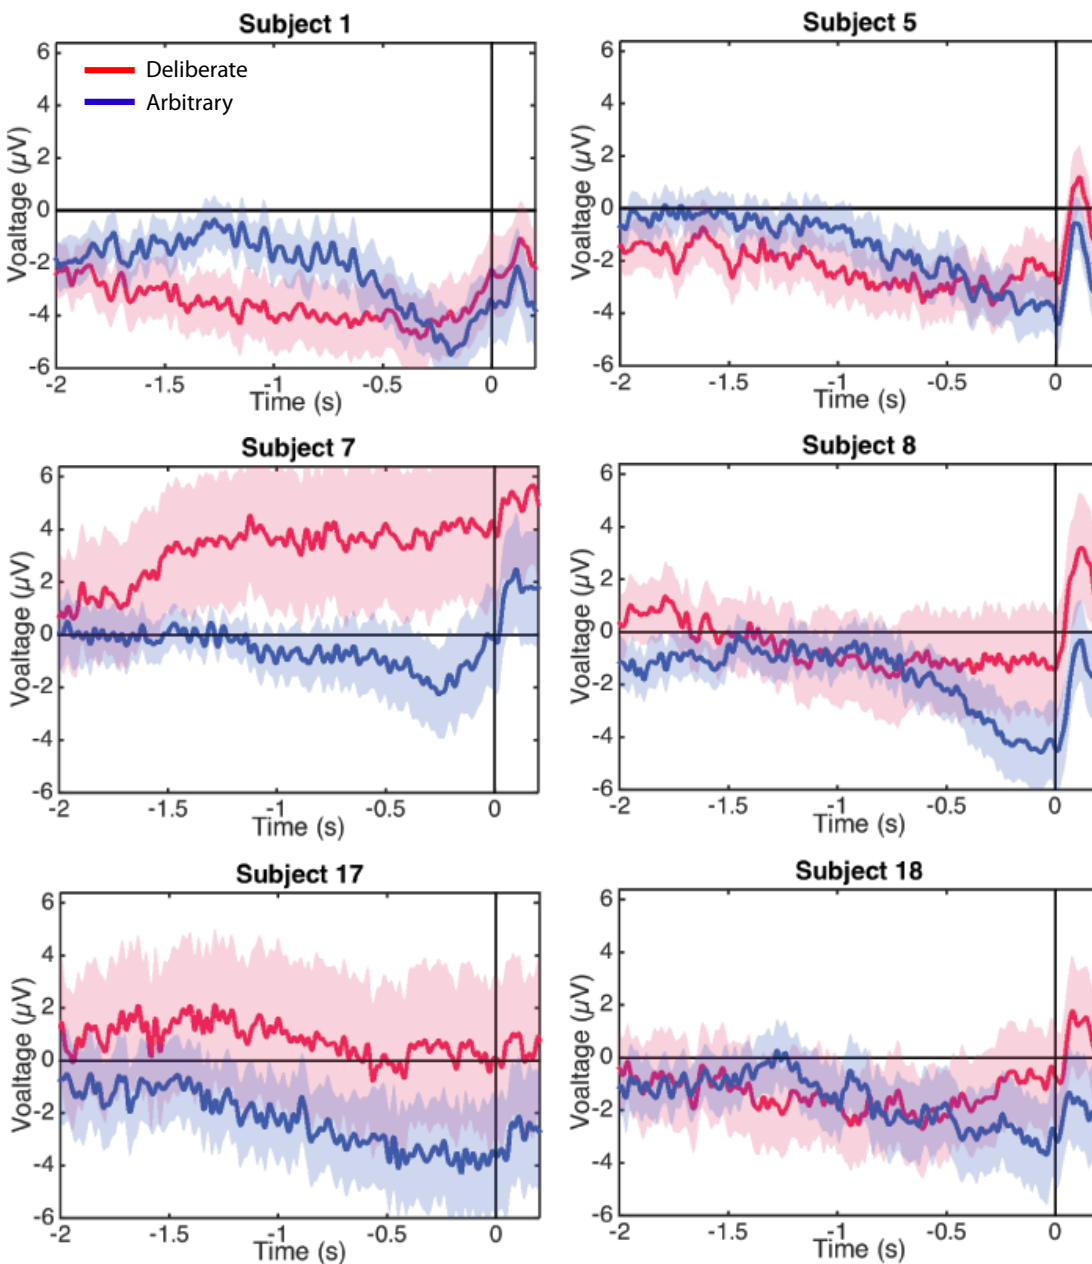

241

242 **Figure 4: Individual-subjects RPs.** Six examples of individual subjects' RPs for deliberate  
243 decisions (in red) and arbitrary ones (in blue) pooled across decision difficulty.



## 244 Control analyses

245 We further tested whether differences in reaction time between the conditions, eye movements,  
246 filtering, and subjects' consistency scores might explain our effect. We also tested whether the  
247 RPs might reflect some stimulus-locked potentials or be due to baseline considerations.

248 *Differences in reaction times (RT) between conditions, including stimulus-locked potentials*  
249 *and baselines, do not drive the effect*

250 RTs in deliberate decisions were typically more than twice as long as RTs in arbitrary  
251 decisions. We therefore wanted to rule out the possibility that the absence of RP in deliberate  
252 decisions stemmed from the difference in RTs between the conditions. We carried out six  
253 analyses for this purpose. First, we ran a median split analysis—dividing the subjects into two  
254 groups based on their RTs: lower (faster) and higher (slower) than the median, for deliberate  
255 and arbitrary trials, respectively. We then ran the same analysis using only the faster subjects  
256 in the deliberate condition ( $M=1.91$  s,  $SD=0.25$ ) and the slower subjects in the arbitrary  
257 condition ( $M=1.25$  s,  $SD=0.23$ ). If RT length affects RP amplitudes, we would expect the RP  
258 amplitudes to be more similar between these two groups. However, though there were only  
259 half the data points, a similar pattern of results to those over the whole dataset was observed  
260 (Fig. 5A; compare to Fig. 3A). Deliberate and arbitrary decisions were still reliably different  
261 ( $F(1,17)=5.22$ ,  $p=0.03$ ), with significant RPs found in arbitrary (easy:  $t(8)=4.57$ ,  $p=0.0018$ ;  
262 hard:  $t(8)=4.09$ ,  $p=0.0035$ ), but not deliberate (easy:  $t(8)=1.92$ ,  $p=0.09$ ; hard:  $t(8)=0.63$ ,  
263  $p=0.54$ ) decisions. In addition, the RPs for arbitrary decisions were not significantly different  
264 between the subjects with above-median RTs and the entire population for the easy or hard  
265 conditions (easy:  $t(25)=0.14$ ,  $p>0.5$ ; hard:  $t(25)=0.56$ ,  $p>0.5$ ). Similarly, the RPs for deliberate  
266 decisions were not significantly different between the subjects with below-median RTs and the  
267 entire population for the easy or hard conditions (easy:  $t(25)=-0.34$ ,  $p>0.5$ ; hard:  $t(25)=0.17$ ,  
268  $p>0.5$ ). This suggests that RTs do not reliably affect  $C_z$  activation for deliberate or arbitrary  
269 decisions in our results.

270 Second, we regressed the difference between RPs in deliberate and arbitrary decisions  
271 (averaged over the last 500 ms before response onset) against the difference between the RTs  
272 in these two conditions for each subject (Fig. 5B). Again, if RT length affects RP amplitudes,  
273 we would expect differences between RTs in deliberate and arbitrary conditions to correlate  
274 with differences between RPs in the two conditions. But no correlation was found between the  
275 two measures ( $r=0.22$ ,  $t(16)=0.86$ ,  $p=0.4$ ). We further tried regressing the RP differences on  
276 RT differences. The regression did not produce any reliable relation between RT and RP  
277 differences (regression line:  $y = 0.54$  [CI -0.8, 1.89]  $x - 0.95$  [CI -2.75, 0.85]; the  $R^2$  was very  
278 low, at 0.05 (as expected from the  $r$  value above), and, as the confidence intervals suggest, the  
279 slope was not significantly different from 0,  $F(1,16)=0.74$ ,  $p=0.4$ ).

280 While the results of the above analyses suggested that our effects do not stem from differences  
281 between the RTs in deliberate and arbitrary decisions, the average RTs for fast deliberate  
282 subjects were still 660 ms slower than for slow arbitrary subjects. In addition, we had only half  
283 of the subjects in each condition due to the median split, raising the concern that some of our  
284 null results might have been underpowered. We also wanted to look at the effect of cross-trial  
285 variations within subjects and not just cross-subjects ones. We therefore ran a third, within-  
286 subjects analysis. We combined the two decision difficulties (easy and hard) for each decision  
287 type (arbitrary and deliberate) for greater statistical power. And then we took the faster (below-  
288 median RT) deliberate trials and slower (above-median RT) arbitrary trials for each subject  
289 separately. So, this time we had 17 subjects (again, one was removed) and better powered  
290 results. Here, fast deliberate arbitrary trials ( $M=1.63$  s,  $SD=0.25$ ) were just 230 ms slower than

291 slow arbitrary decisions ( $M=1.40$  s,  $SD=0.45$ ), on average. This cut the difference between fast  
 292 deliberate and slow arbitrary by about 2/3 from the between-subjects analysis. We then  
 293 computed the RPs for just these fast deliberate and slow arbitrary trials within each subject  
 294 (Fig. 5C). Visually, the pattern there is the same as the main analysis (Fig. 3A). What is more,  
 295 deliberate and arbitrary decisions remained reliably different ( $t(16)=3.36$ ,  $p=0.004$ ). Arbitrary  
 296 trials were again different from 0 ( $t(16)=-4.40$ ,  $p=0.0005$ ), while deliberate trials were not  
 297 ( $t(16)=-1.54$ ,  $p=0.14$ ).

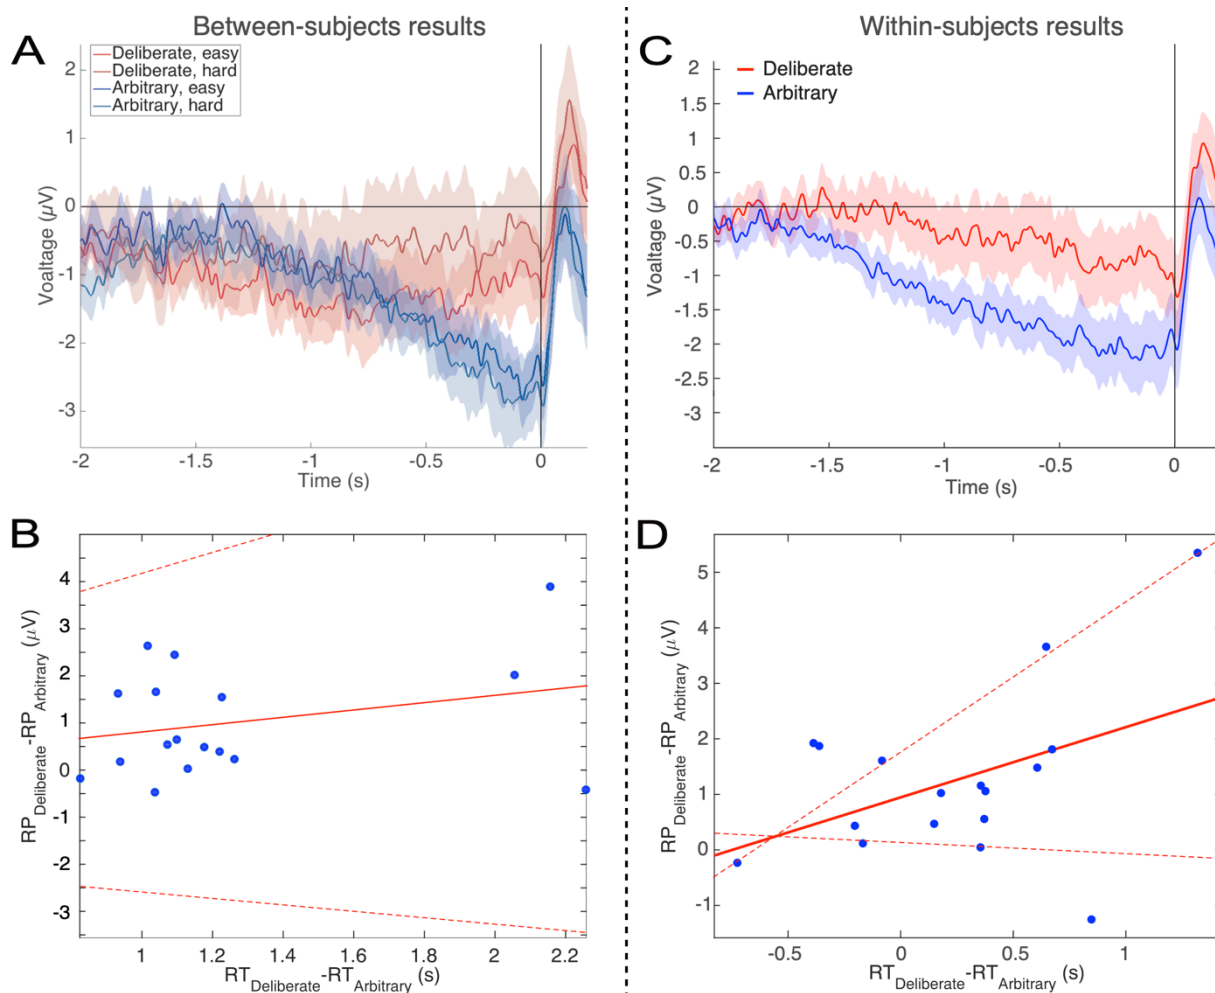

298

299 **Figure 5: Relations between RTs and RPs between subjects (A&B) and within subjects**  
 300 **(C&D).** (A) The subjects with above-median RTs for arbitrary decisions (in blue) and below-  
 301 median RTs for deliberate decisions (in red), show the same activity pattern that was found in  
 302 the main analysis (compare Fig. 3A). (B) A regression of the difference between the RPs versus  
 303 the difference between the RTs for deliberate and arbitrary decisions for each subject. The  
 304 equation of the regression line (solid red) is  $y = 0.54 [CI -0.8, 1.89] x - 0.95 [CI -2.75, 0.85]$   
 305 (confidence intervals: dashed red lines). The  $R^2$  is 0.05. One subject, #7, had an RT difference  
 306 between deliberate and arbitrary decisions that was more than 6 interquartile ranges (IQRs)  
 307 away from the median difference across all subjects. That same subject's RT difference was  
 308 also more than 5 IQRs higher than the 75<sup>th</sup> percentile across all subjects. That subject was  
 309 therefore designated an outlier and removed only from this regression analysis. (C) For each  
 310 subject separately, we computed the RP using only the faster (below-median RT) deliberate  
 311 trials and slower (above-median RT) arbitrary trials. The pattern is again the same as the one  
 312 found for the main analysis. (D) We computed the same regression between the RP differences  
 313 and the RT differences as in B, but this time the median split was within subjects. The equation  
 314 of the regression line is  $y = 1.27 [CI -0.2, 2.73] x - 0.95 [CI 0.14, 1.76]$ . The  $R^2$  is 0.18.

315 We further regressed the within-subject differences between RPs in fast deliberate and slow  
316 arbitrary decisions (defined as above) against the differences between the corresponding RTs  
317 for each subject to ascertain that such a correlation would not exist for trials that are closer  
318 together. We again found no reliable relation between the two differences (Fig. 5D; regression  
319 line:  $y = 1.27 [CI -0.2, 2.73] x - 0.95 [CI 0.14, 1.76]; R^2=0.18$ ).

320 Yet another concern that could relate to the RT differences among the conditions is that the RP  
321 in arbitrary blocks might actually be some potential evoked by the stimuli (i.e., the  
322 presentations of the two causes), specifically in arbitrary blocks, where the RTs are shorter  
323 (and thus stimuli-evoked effects could still affect the decision). In particular, a stimulus-evoked  
324 potential might just happen to bear some similarity to the RP when plotted locked to response  
325 onset. To test this explanation, we ran a fifth analysis, plotting the potentials in all conditions,  
326 locked to the onset of the stimulus (Fig. 6A). We also plotted the response-locked potentials  
327 across an expanded timecourse for comparison (Fig. 6B). If the RP-like shape we see in Figs.  
328 3A and 6B is due to a stimulus-locked potential, we would expect to see the following before  
329 the 4 mean response onset times (indicated by vertical lines at 0.98 and 1.00, 2.13, and 2.52 s  
330 for arbitrary easy, arbitrary hard, deliberate easy, and deliberate hard, respectively) in the  
331 stimulus-locked plot (Fig. 6A): Consistent potentials, which precede the mean response times,  
332 that would further be of a similar shape and magnitude to the RPs found in the decision-locked  
333 analysis in the arbitrary condition (though potentially more smeared for stimulus locking). We  
334 thus calculated a stimulus-locked version of our ERPs, using the same baseline (Fig. 6A). As  
335 the comparison between Fig. 6A and 6B clearly shows, no such consistent potentials were  
336 found before the 4 response times, nor were these potentials similar to the RP in either shape or  
337 magnitude (their magnitudes are at the most around  $1\mu V$ , while the RP magnitudes we found  
338 are around  $2.5\mu V$ ; Figs. 3A, 6B). This analysis thus suggests that it is unlikely that a stimulus-  
339 locked potential drives the RP we found.

340 Notably, the stimulus-locked alignment did imply that the arbitrary easy condition evoked a  
341 stronger activity in roughly the last 0.5 s before stimulus onset. However, this prestimulus  
342 activity cannot explain the response-locked RP, as it was found *only in arbitrary easy trials*  
343 and not in arbitrary hard trials. At the same time, the response-locked RP did not differ  
344 between these conditions. What is more, easy and hard trials were randomly interspersed  
345 within deliberate and arbitrary blocks, and the subject discovered the trial difficulty only at  
346 stimulus onset. Thus, there could not have been differential preparatory activity that varies  
347 with decision difficulty. This divergence in one condition only is accordingly not likely to  
348 reflect any preparatory RP activity.

349 One more concern is that the differences in RTs may affect the results in the following manner:  
350 Because the main baseline period we used thus far was 1 to 0.5 s before stimulus onset, the  
351 duration from the baseline to the decision varied widely between the conditions. To make sure  
352 this difference in temporal distance between the baseline period and the response to which the  
353 ERPs were locked did not drive our results, we recalculated the potentials for all conditions  
354 with a *response-locked* baseline of -1 to -0.5 s (Fig. 6C; the same baseline we used for the  
355 Bayesian analysis above). The rationale behind this choice of baseline was to have the time  
356 that elapsed from baseline to response onset be the same across all conditions. As is evident in  
357 Fig. 6C, the results for this new baseline were very similar to those for the stimulus-locked  
358 baseline we used before. Focusing again on the -0.5 to 0 s range before response onset for our  
359 statistical tests, we found a clear RP in arbitrary decisions, yet RP amplitude was not  
360 significantly different from 0 in deliberate decisions (Fig. 6C; ANOVA  $F(1,17)=12.09$ ,  
361  $p=0.003$  for the main effect of decision type; in t-tests against 0, corrected for multiple  
362 comparisons, an effect was only found for arbitrary decisions (hard:  $t(17)=4.13$ ,  $p=0.0007$ ;  
363 easy:  $t(17)=4.72$ ,  $p=0.0002$ ) and not for deliberate ones (hard:  $t(17)=0.38$ ,  $p>0.5$ ; easy:

364  $t(17)=1.13, p=0.27$ ). This supports the notion that the choice of baseline does not strongly  
365 affect our main results. Taken together, the results of the six analyses above provide strong  
366 evidence against the claim that the differences in RPs stem from or are affected by the  
367 differences in RTs between the conditions.

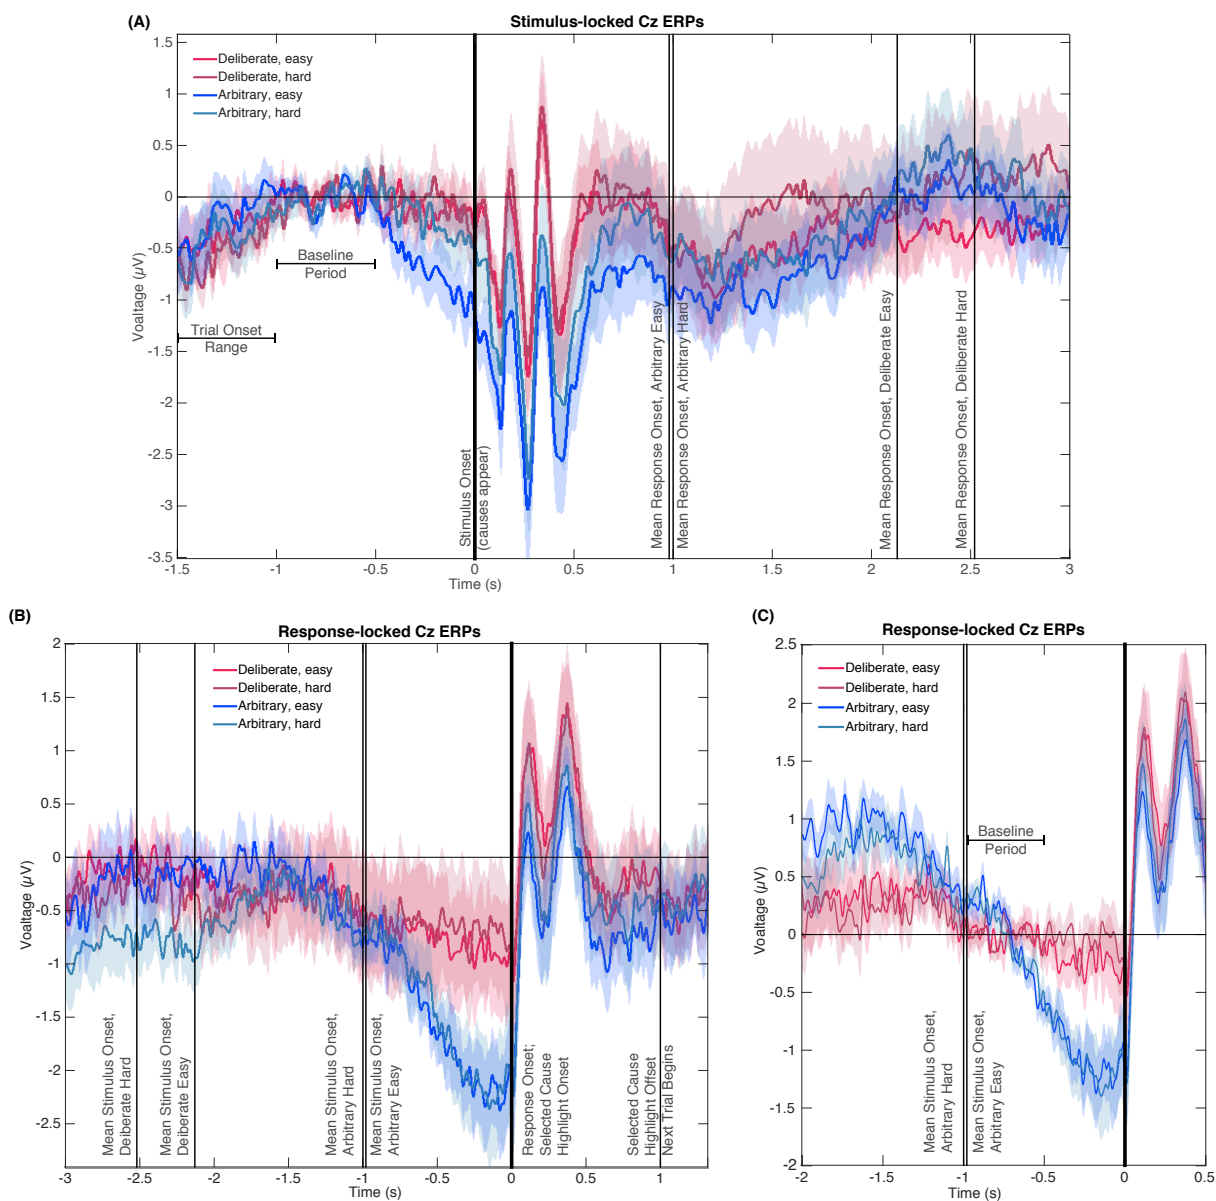

368

369 **Figure 6: Stimulus- and response-locked Cz-electrode ERPs with different baselines and**  
370 **overlaid events. (A)** Stimulus-locked waveforms including the trial onset range, baseline  
371 period, and mean reaction times for all four experimental conditions. **(B)** Response-locked  
372 waveforms with mean stimulus onsets for all four conditions as well as the offset of the  
373 highlighting of the selected cause and the start of the next trial. **(C)** Same potentials and  
374 timeline as Fig. 3A, but with a *response-locked* baseline of -1 to -0.5 s—the same baseline used  
375 for our Bayesian analysis.

376 *Eye movements do not affect the results*

377 Though ICA was used to remove blink artifacts and saccades (see Methods), we wanted to  
378 make sure our results do not stem from differential eye movement patterns between the  
379 conditions. We therefore computed a saccade-count metric (SC; see Methods) for each trial for  
380 all subjects. Focusing again on the last 500 ms before response onset, we computed mean

381 ( $\pm$ s.e.m.) SC values of  $1.65\pm 0.07$  and  $1.67\pm 0.06$  saccades for easy and hard deliberate  
382 decisions, respectively, and  $1.69\pm 0.07$  and  $1.73\pm 0.07$  saccades for easy and hard arbitrary  
383 decisions, respectively. We found no reliable differences between the number of saccades  
384 during deliberate and arbitrary trials ( $F(1,17)=2.56$ ,  $p=0.13$  for main effect of decision type).

385 We further investigated potential effects of saccades by running a median-split analysis—  
386 dividing the trials for each subject into two groups based on their SC score: lower and higher  
387 than the median, for deliberate and arbitrary trials, respectively. We then ran the same analysis  
388 using only the trials with more saccades in the deliberate condition (SC was  $2.02\pm 0.07$  and  
389  $2.04\pm 0.07$  for easy and hard, respectively) and those with less saccades for the arbitrary  
390 condition (SC was  $1.33\pm 0.07$  and  $1.31\pm 0.08$  for easy and hard, respectively). If the number of  
391 saccades affects RP amplitudes, we would expect that the differences in RPs between arbitrary  
392 and deliberate trials will diminish, or even reverse (as now we had more saccades in the  
393 deliberate condition). However, though there were only half the data points for each subject in  
394 each condition, a similar pattern of results to those over the whole dataset was observed:  
395 Deliberate and arbitrary decisions were still reliably different within the median-split RPs  
396 ( $F(1,17)=16.70$ ,  $p<0.001$ ), with significant RPs found in arbitrary (easy:  $t(17)=4.79$ ,  $p=0.002$ ;  
397 hard:  $t(17)=5.77$ ,  $p<0.001$ ), but not deliberate (easy:  $t(17)=0.90$ ,  $p=0.38$ ; hard:  $t(17)=0.30$ ,  
398  $p>0.5$ ) decisions. In addition, we compared the RP data across all the trials with the median-  
399 split RP data above. No significant differences were found for arbitrary decisions (easy:  
400  $t(17)=1.02$ ,  $p=0.32$ ; hard:  $t(17)=0.75$ ,  $p=0.46$ ) or for deliberate decisions (easy:  $t(17)=1.63$ ,  
401  $p=0.12$ ; hard:  $t(17)=1.47$ ,  $p=0.16$ ). Taken together, the analyses above provide strong evidence  
402 against the involvement of eye movements in our results.

#### 403 *Testing alternative explanations*

404 We took a closer look at subjects' behavior in the easy arbitrary condition, where some  
405 subjects had a consistency score that was further above 0.5 (chance) than others. It seems like  
406 those subjects had a greater difficulty ignoring their preferences, despite the instructions to do  
407 so. We therefore wanted to test to what extent the RP of those subjects was similar to the RPs  
408 of the other subjects. Focusing on the 8 subjects that had a consistency score above 0.55  
409 ( $M=0.59$ ,  $SD=0.03$ ) and comparing their RPs to those of the 10 other subjects (consistency  
410  $M=0.50$ ,  $SD=0.06$ ) in easy arbitrary trials, we found no reliable differences ( $t(16)=0.94$ ,  
411  $p=0.36$ ). This is not surprising, as the mean consistency score of these subjects—though higher  
412 than chance—was still far below their consistency score for easy deliberate decisions ( $M=0.99$ ,  
413  $SD=0.02$ ).

#### 414 *High-pass filter cutoff frequency does not affect the results*

415 Finally, another alternative explanation might rely on our selection of high-pass filter cutoff  
416 frequency, which was 0.1 Hz. Though this frequency was used in some studies of the RP (e.g.,  
417 Lew, Chavarriaga, Silvoni, & Millán, 2012; MacKinnon, Allen, Shiratori, & Rogers, 2013),  
418 others opted for lower cutoff frequencies (e.g., Haggard & Eimer, 1999). Arguably, a higher  
419 cutoff frequency for the high-pass filter might reduce the chances to find the RP, which is a  
420 low-frequency component. And this might have affected the deliberate decision more than the  
421 arbitrary one, given the slower RTs there. To examine this possible confound, we reanalyzed  
422 the data using a 0.01 high-pass filter. This reduced the number of usable trials for each subject,  
423 as it allowed lower-frequency trends to remain in the data. Given that our focus was on  
424 arbitrary vs. deliberate decisions (with decision difficulty serving mostly to validate the  
425 manipulation), we collapsed the trials across decision difficulty, and only tested RP amplitudes  
426 in arbitrary vs. deliberate decisions against each other and against zero. In line with our  
427 original results, a difference was found between RP amplitude in the two conditions

428 (t(13)=2.29, p=0.0394), with RP in the arbitrary condition differing from zero (t(13)=-5.71,  
429 p<0.0001), as opposed to the deliberate condition, where it did not (t(13)=-0.76, p=0.462). This  
430 provides evidence against the claim that our results are due to our choice of high-pass filter.

#### 431 EEG Results: Lateralized Readiness Potential (LRP)

432 The LRP, which reflects activation processes within the motor cortex for action preparation  
433 after action selection (Eimer, 1998; Masaki, Wild-wall, Sangals, & Sommer, 2004), was  
434 measured by subtracting the difference potentials (C3-C4) in right-hand response trials from  
435 this difference in left-hand responses trials and averaging the activity over the same time  
436 window (Eimer, 1998; Haggard & Eimer, 1999). In this purely motor component, no  
437 difference was found between the two decision types and conclusive evidence against an effect  
438 of decision type was further found (Fig. 7; all  $F_s < 0.35$ ; BF=0.299). Our analysis of EOG  
439 channels suggests that some of that LRP might be driven by eye movements (we repeated the  
440 LRP computation on the EOG channels instead of C3 and C4). However, the shape of the eye-  
441 movement-induced LRP is very different from the LRP we calculated from C3 and C4. Also,  
442 the differences that we found between conditions in the EOG LRP are not reflected in the  
443 C3/C4 LRP. So, while our LRP might be boosted by eye movements, it is not strictly driven by  
444 these eye movements.

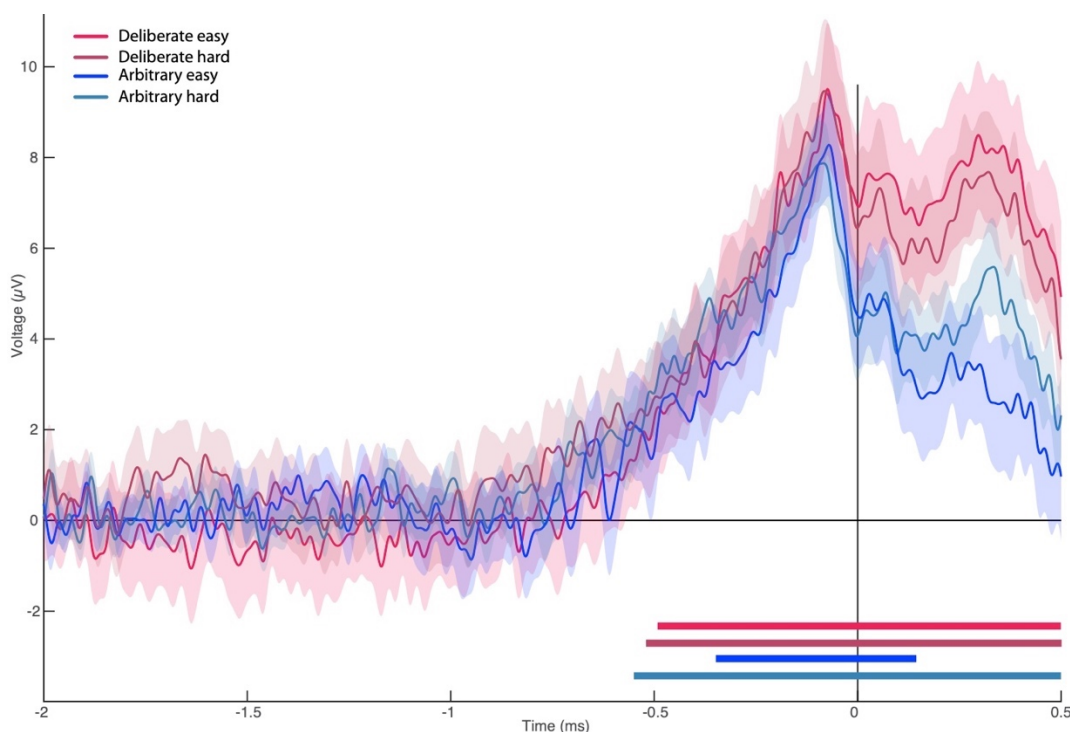

445 **Figure 7: Lateralized readiness potential.** The lateralized readiness potential (LRP) for  
446 deliberate and arbitrary, easy and hard decisions. No difference was found between the  
447 conditions (ANOVA all  $F_s < 1$ ). Temporal clusters where the activity for each condition was  
448 independently found to be significantly different from 0 are designated by horizontal thick lines  
449 at the bottom of the figure (with their colors matching the legend).  
450

#### 451 Modeling 452

453 The main finding of this study—the absent (or at least strongly diminished) RP in deliberate  
454 decisions, suggesting different neural underpinnings of arbitrary and deliberate decisions—is  
455 in line with a recent study using a drift-diffusion model (DDM) to investigate the RP (Schurger  
456 et al., 2012). There, the RP was modeled as an accumulation of white noise up to a hard  
457 threshold. When activity crosses that threshold, it designates decision-onset leading to

458 movement. The model focuses on the activity leading up to the threshold crossing, when that  
459 activity is time-locked to the onset of the threshold crossing (corresponding to movement-  
460 locked epochs in EEG). Averaging across many threshold crossings, this white-noise activity  
461 accumulates, and it resembles an RP (Schurger et al., 2012). Hence, according to this model,  
462 the threshold crossing leading to response onset is largely determined by spontaneous,  
463 subthreshold, white-noise fluctuations of the neural activity. This interpretation of the RP  
464 challenges its traditional understanding as stemming from specific, unconscious preparation  
465 for, or ballistic-like initiation of, movement (Shibasaki & Hallett, 2006). Instead, Schurger and  
466 colleagues claimed, time-locking to response onset ensures that these spontaneous fluctuations  
467 appear, when averaged over many trials, as a ramp-up in neural activity resembling an RP.

468 We wanted to investigate whether our results could be accommodated within the general  
469 framework of the Schurger model. We wanted to test the possibility that deliberate and  
470 arbitrary decisions are mediated by two different mechanisms. The first mechanism is involved  
471 in value assessment and drives deliberate decisions. It may be subserved by brain regions like  
472 the Ventromedial Prefrontal Cortex; VMPFC, (Ramnani & Owen, 2004; Wallis, 2007). But,  
473 for the sake of the model, we will remain agnostic about the exact location associated with  
474 deliberate decisions and refer to this region as Region X. A second mechanism, possibly at the  
475 (pre-)SMA, was held to generate arbitrary decisions driven by random, noise fluctuations.

476 Accordingly, we expanded the model developed by Schurger et al. (2012) in two manners.  
477 First, we defined two DDM processes—one devoted to value-assessment (in Region X) and the  
478 other to noise-generation (in SMA; see Fig. 8A and Methods). Both of them were run during  
479 both decision types, yet the former determined the result of deliberate trials, and the latter  
480 determined the results of arbitrary trials. Second, Schurger and colleagues modeled only *when*  
481 subjects would move and not *what* (which hand) subjects would move. We wanted to account  
482 for the fact that, in our experiment, subjects not only decided when to move, but also what to  
483 move (either to indicate which NPO they prefer in the deliberate condition, or to generate a  
484 meaningless right/left movement in the arbitrary condition). We modeled this by defining two  
485 types of movement. One was moving the hand corresponding to the location of the NPO that  
486 was rated higher in the first, rating part of the experiment (the *congruent* option; see Methods).  
487 The other was moving the hand corresponding to the location of the lower-rated NPO (the  
488 *incongruent* option). We used the race-to-threshold framework to model the decision processed  
489 between a pair of leaky, stochastic accumulators, or DDMs (see again Fig. 8A). One DDM  
490 simulated the process that leads to selecting the congruent option, and the other simulated the  
491 process that leads to selecting the incongruent option. Hence, in each model run, the two  
492 DDMs ran in parallel; the first one to cross the threshold determined the decision outcome.  
493 And so, if the DDM corresponding to the congruent (incongruent) option reached the threshold  
494 first, the trial ended with selecting the congruent (incongruent) option. Thus, for deliberate  
495 decisions, the congruent cause had a higher value than the incongruent cause; the DDM  
496 associated with the congruent option accordingly had a higher drift rate than that of the DDM  
497 associated with the incongruent option. For arbitrary decisions, the values of the decision  
498 alternatives mattered very little and this was reflected in the small differences, if at all, among  
499 the drift rates (Table 1).

500 Therefore, taken together, these two changes to the original model by Schurger and colleagues  
501 resulted in a model that included four DDMs, divided into two pairs, each pair racing to a  
502 threshold (Fig. 8A); the first pair reflected the value assessment process (taking place in  
503 Region X, and determining the result of deliberate decisions). The second reflected a  
504 mechanism of threshold crossing by random fluctuations (taking place in the SMA and  
505 determining the results of arbitrary decisions). Each such pair included one DDM for the  
506 congruent option and one DDM for the incongruent option. And so, in each trial, the four

507 DDMs were run, and the decision outcome was determined by the first DDM to reach the  
508 threshold in the noise component for arbitrary decisions and in the value component for  
509 deliberate decisions.

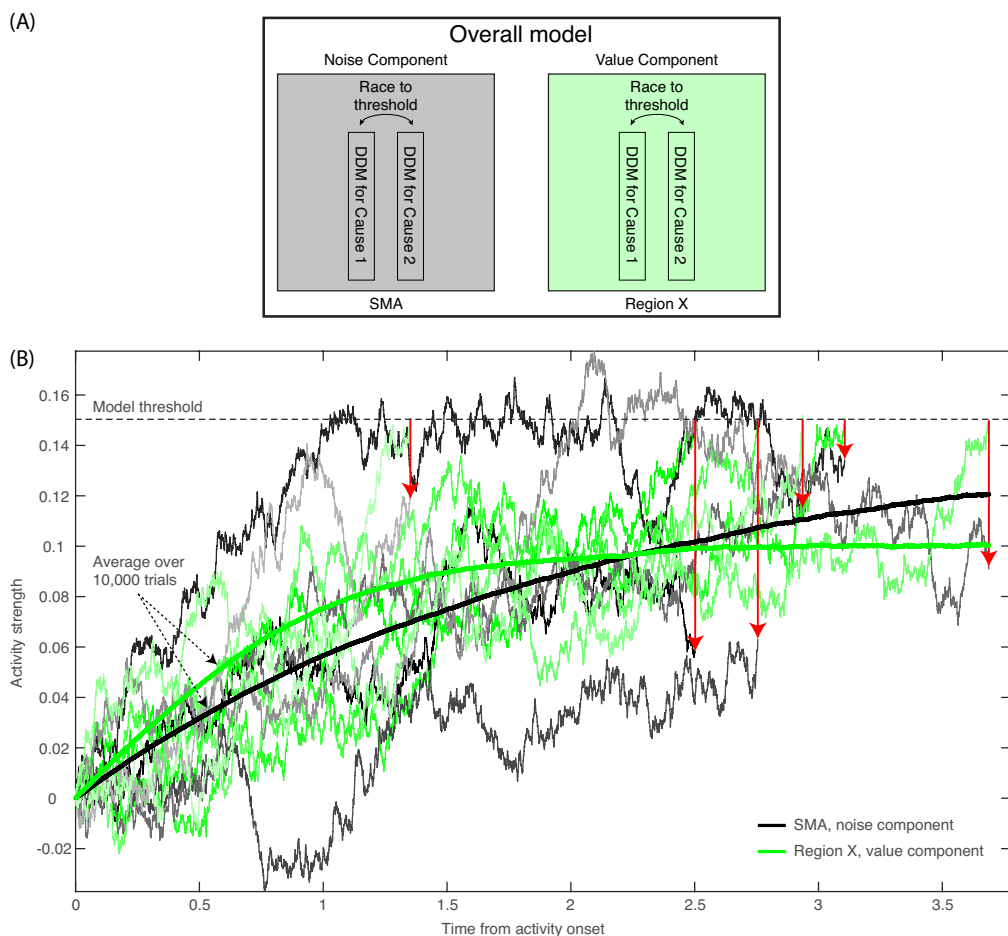

510

511 **Figure 8: Model description and model runs in the SMA and in Region X.** (A) A block  
512 diagram of the model, with its noise (SMA) and value (Region X) components, each  
513 instantiated as a race to threshold between a pair of DDMs (or causes—one congruent with the  
514 ratings in the first part of the experiment, the other incongruent). (B) A few runs of the model  
515 in the deliberate condition, in Region X (green colors), depicting the DDM for the congruent  
516 option. As is apparent, the DDM stops when the value-based component reaches threshold. Red  
517 arrows point from the Region X DDM trace at threshold to the corresponding time in the trace  
518 in the SMA (black and gray colors). The SMA traces integrate without a threshold (as the  
519 decision outcome is solely determined by the value component in Region X). The thick green  
520 and black lines depict average Region X and SMA activity over 10,000 model runs, locked to  
521 *stimulus onset*, respectively. (Note that this panel depicts stimulus-locked activity and not  
522 response-locked activity. So, we do not expect to find an RP in either brain region.

523 Therefore, within this framework,  $C_z$ -electrode activity (above SMA) should mainly reflect the  
524 noise-generation component—as was proposed by Schurger et al. (2012). (Note that we  
525 suggest that noise generation might be a key function of the SMA and other brain regions  
526 underneath the  $C_z$  electrode, *at least during this specific task*. When subjects make arbitrary  
527 decisions, these might be based on some symmetry-breaking mechanism, which is driven by  
528 random fluctuations that are here simulated as noise. Thus, we neither claim nor think that  
529 noise generation is the main purpose or function of these brain regions in general.)

530 The critical prediction of our model for our purposes relates to what happens during deliberate  
531 decisions in the SMA ( $C_z$  electrode). For ease of explanation, and because decision difficulty



532 had no consistent effect on the EEG data, we focus the discussion below on easy decisions  
533 (though the same holds for hard decisions). According to our model, the race-to-threshold pair  
534 of DDMs that would determine deliberate decisions and trigger the ensuing action is the value-  
535 assessment one in Region X. Hence, when the first DDM of the Region X pair would reach the  
536 threshold, the decision would be made and movement would ensue. The SMA pair, in contrast,  
537 would not integrate toward a decision (Fig. 8B). We modeled this by not including any  
538 decision threshold in the SMA in deliberate decisions (i.e., the threshold was set to infinity,  
539 letting the DDM accumulate forever). (The corresponding magnitudes of the drift-rate are  
540 detailed in the Methods.) So, what happens in the SMA (and supposedly recorded using  
541 electrode Cz) when Region X activity reaches the threshold? SMA activity will have  
542 accumulated to some random level (Fig. 8B). This entails that, when we align such SMA  
543 activity to movement onset, we will find just a simple, weak linear trend in the SMA. This  
544 trend is the one depicted in red in Fig. 9C (in red) for the deliberate easy and hard conditions  
545 (here model activity was flipped vertically—from increasing above the  $x$  axis to decreasing  
546 below it—as in Schurger et al., 2012). In arbitrary decisions, on the other hand, the SMA pair  
547 determines the outcome, and motion ensues whenever one of the DDMs crosses the threshold.  
548 Thus, when its activity is inspected with respect to movement onset, it forms the RP-like shape  
549 of Fig. 9C (in blue), in line with the model by Schurger and colleagues (2012).

550 Akin to the Schurger model, we fit our DDMs to our average empirical reaction-times, which  
551 were 2.13, 2.52, 0.98 and 1.00 s for the different conditions (henceforth, magnitudes are given  
552 for deliberate easy, deliberate hard, arbitrary easy, and arbitrary hard, respectively, in this  
553 order), and predicted the resulting ERP patterns. The model's corresponding mean RTs were  
554 2.04, 2.46, 0.94, and 0.96 s for these conditions (Fig. 9A, B). The model was simultaneously fit  
555 to the empirical consistency ratios (the proportions of congruent decisions), which were 0.99,  
556 0.83, 0.54 and 0.49. The model's corresponding consistency ratios were 1.00, 0.84, 0.53 and  
557 0.53. The model then predicted the shape of the ERP in its noise component, over the SMA  
558 (assumed to be reflected by Cz-electrode activity) for each decision type: a continuing, RP-like  
559 increase in activity (with a negative sign) for arbitrary decisions, but only a very slight increase  
560 in activity for deliberate decisions (Fig. 9C, here a decrease due to the negative sign). This was  
561 in line with our empirical results (compare Fig. 3A). Note that that the Schurger model aims to  
562 account for neural activity leading up to the decision to move, but no further (Schurger et al.,  
563 2012). Similarly, we expect our DDM to fit Cz neural data only up to around -0.1 s (100 ms  
564 before response onset). We also make no claims that ours is the only, or even optimal, model  
565 that explains our results. Rather, by extending the Schurger model, our goal was to show how  
566 that interpretation of the RP could also be applied to our more-complex paradigm. (We refer  
567 the reader to work by Schurger and colleagues (Schurger, 2018; Schurger et al., 2012) for  
568 further discussions about the model, its comparison to other models, and the relation to  
569 conscious-decision onset).

570

## 571 Discussion

572 Since the publication of Libet's seminal work claiming that neural precursors of action, in the  
573 form of the RP, precede subjects' reports of having consciously decided to act (Libet et al.,  
574 1983), a vigorous discussion has been raging among neuroscientists, philosophers, and other  
575 scholars about the meaning of these findings for the debate on free will (recent collections  
576 include (Mele, 2015; Pockett, Banks, & Gallagher, 2009; Sinnott-Armstrong & Nadel, 2011)).  
577 Some claim that these results have removed conscious will from the causal chain leading to  
578 action (Haggard, 2005, 2008; Libet, 1985; Wegner, 2002). Others are unconvinced that these  
579 results are decisive for, or even applicable to, the free-will debate (Breitmeyer, 1985; Mele,

580 2009; Nahmias, Shepard, & Reuter, 2014; Roskies, 2010). At the heart of much of this debate  
581 lies the RP, thought to represent unconscious decision/planning mechanisms that initiate  
582 subjects' decisions prior to their conscious experience of deciding (Kornhuber & Deecke,  
583 1990; Libet et al., 1983).

584

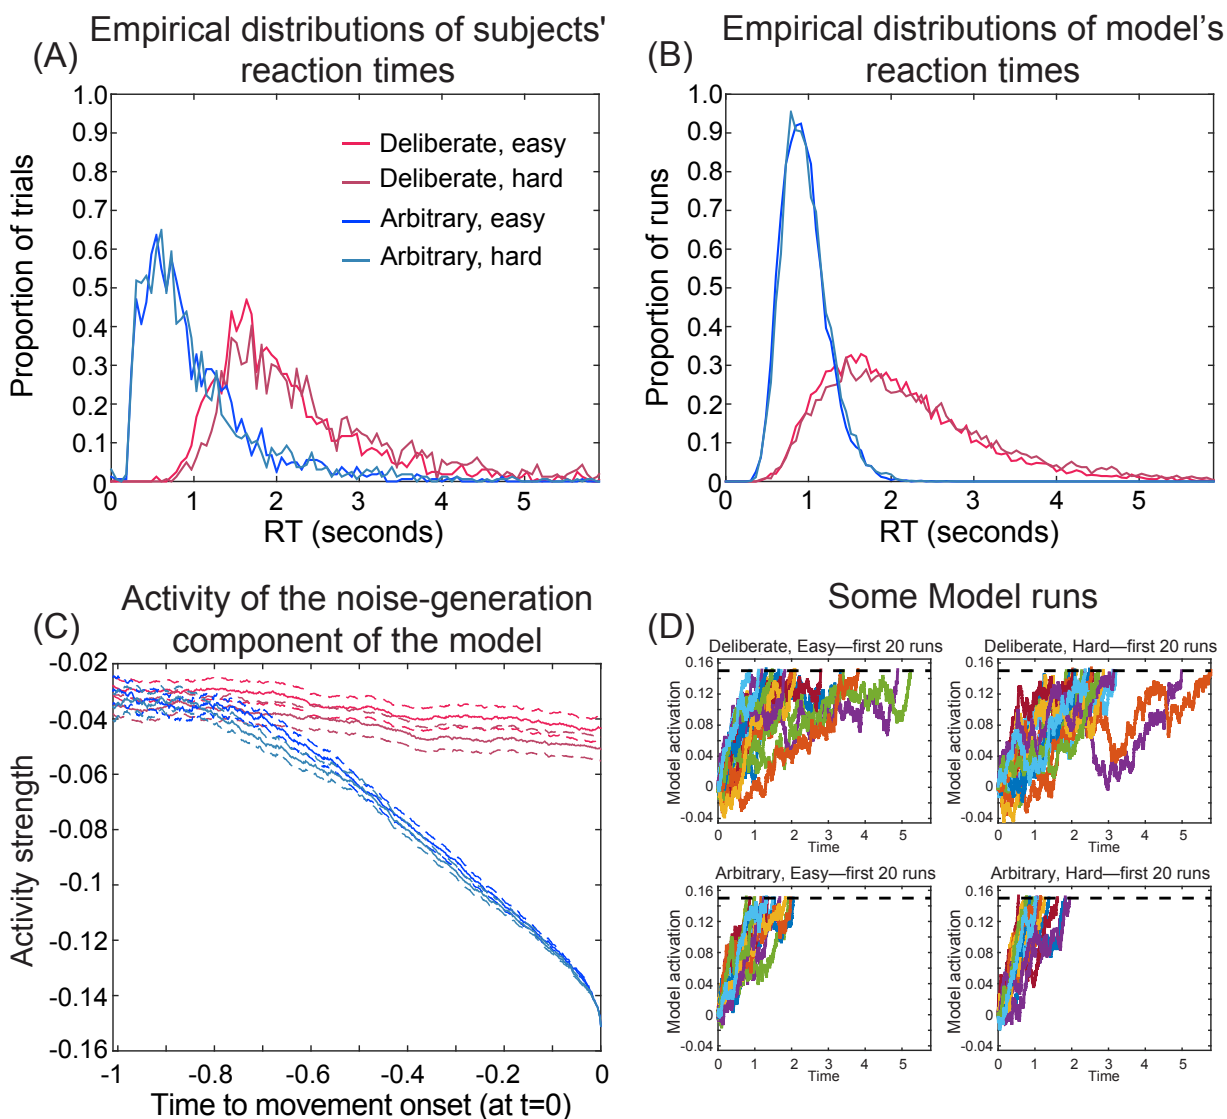

585

586 **Figure 9: Empirical and model RTs and model prediction for Cz activity.** (A) The  
587 empirical distributions of subjects' RTs across the four decision types. (B) The equivalent  
588 distributions of RTs for the model. (C) The model's prediction for the ERP activity in its noise  
589 component (Fig. 8A) in the SMA (electrode Cz) across all four decision types. (D) The first 20  
590 model runs for the value component (Region X) in deliberate decisions (top) and for the noise-  
591 generation component (SMA) in arbitrary decisions (bottom). The integration threshold, at  
592 0.15, is designated by a dashed line in all decision conditions. Here  $t = 0$  s designates the  
593 beginning of the model's run.

594 Notably, the RP and similar findings showing neural activations preceding the conscious  
595 decision to act have typically been based on arbitrary decisions (Haggard & Eimer, 1999; Lau  
596 et al., 2004; Libet, 1985; Libet et al., 1983; Sirigu et al., 2004; Soon et al., 2008; Soon et al.,  
597 2013). This, among other reasons, rested on the notion that for an action to be completely free,  
598 it should not be determined in any way by external factors (Libet, 1985)—which is the case for

599 arbitrary, but not deliberate, decisions (where each decision alternative is associated with a  
600 value, and the values of alternatives typically guide one's decision). But this notion of freedom  
601 faces several obstacles. First, most discussions of free will focus on deliberate decisions,  
602 asking when and whether these are free (Frankfurt, 1971; Hobbes, 1994; Wolf, 1990). This  
603 might be because everyday decisions to which we associate freedom of will—like choosing a  
604 more expensive but more environmentally friendly car, helping a friend instead of studying  
605 more for a test, donating to charity, and so on—are generally deliberate, in the sense of being  
606 reasoned, purposeful, and bearing consequences (although see Deutschländer, Pauen, and  
607 Haynes (2017)). In particular, the free will debate is often considered in the context of moral  
608 responsibility (e.g., was the decision to harm another person free or not) (Fischer, 1999;  
609 Haggard, 2008; Maoz & Yaffe, 2015; Roskies, 2012; Sinnott-Armstrong, 2014; Strawson,  
610 1994), and free will is even sometimes defined as the capacity that allows one to be morally  
611 responsible (Mele, 2006, 2009). In contrast, it seems meaningless to assign blame or praise to  
612 arbitrary decisions. Thus, though the scientific operationalization of free will has typically  
613 focused on arbitrary decisions, the common interpretations of these studies—in neuroscience  
614 and across the free will debate—have often alluded to deliberate ones.

615 Here, we show that inference from arbitrary to deliberate decisions may not be justified, as the  
616 neural precursors of arbitrary decisions, and in particular the RP, do not generalize to  
617 meaningful ones (Breitmeyer, 1985; Roskies, 2010). For *arbitrary decisions*, we replicated  
618 earlier results, with an RP recorded in the Cz electrode, having typical scalp topography and the  
619 expected waveform shape over time. However, the RP was substantially diminished—if not  
620 altogether absent—for *deliberate decisions*; it showed neither the expected slope nor the  
621 expected scalp topography. Null-hypothesis significance testing (NHST) suggested that the  
622 null hypothesis—i.e., that there is no RP—can be rejected for arbitrary decisions but cannot be  
623 rejected for deliberate ones. A cluster-based nonparametric permutation analysis—to locate  
624 temporal windows where EEG activity is reliably different from 0—found prolonged activity  
625 of this type about 1.2 s before movement onset for both types of arbitrary decisions, but no  
626 such activity for either type of deliberate decisions. A Bayesian analysis found clear evidence  
627 for an RP in arbitrary decisions and an inconclusive trend toward no RP in deliberate decisions.  
628 Changing the baseline to make it equally distant from arbitrary and deliberate decisions did  
629 suggest conclusive evidence for no RP in deliberate decisions (while still finding clear  
630 evidence for an RP in arbitrary decisions). Further, trend analysis showed that there is no trend  
631 during the RP time window for deliberate decisions (here Bayesian analysis suggested  
632 moderate to strong evidence against a trend) while there exists a reliable trend for arbitrary  
633 decisions (extremely strong evidence for an effect). Thus, taken together, there is  
634 overwhelming evidence for an RP in arbitrary decisions (in all six different analyses that we  
635 conducted—NHST and Bayesian). But, in contrast, we found no evidence for the existence of  
636 an RP in deliberate decisions (in all six analyses) and, at the same time, there was evidence  
637 against RP existence in such decisions (in five of the six analyses, with the single, remaining  
638 analysis providing only inconclusive evidence for an absence of an RP). Therefore, at the very  
639 least, our results support the claim that the previous findings regarding the RP might be  
640 confined to arbitrary decisions and do not generalize to deliberate ones. The results further  
641 suggest that different neural mechanisms might drive deliberate and arbitrary decisions. This  
642 clearly challenges the generalizability of previous studies relying on arbitrary decisions,  
643 regardless of whether they were based on the RP or not.

644 Interestingly, while the RP was present in arbitrary decisions but absent in deliberate ones, the  
645 LRP—a long-standing, more-motor ERP component, which began much later than the RP—  
646 was indistinguishable between the different decision types. This provides evidence that, at the  
647 motor level, the neural representation of the deliberate and arbitrary decisions that our subjects  
648 made may have been indistinguishable, as was our intention when designing the task.

649 Our finding and the model thus suggest that two different mechanisms may be involved in  
650 arbitrary and deliberate decisions. Earlier literature demonstrated that deliberate, reasoned  
651 decision-making—which was mostly studied in the field of neuroeconomics (Kable &  
652 Glimcher, 2009) or using perceptual decisions (Gold & Shadlen, 2007)—elicited activity in the  
653 prefrontal cortex (PFC; mainly the dorsolateral (DLPFC) part (Sanfey, Rilling, Aronson,  
654 Nystrom, & Cohen, 2003; Wallis & Miller, 2003) and ventromedial (VMPFC)  
655 part/orbitofrontal cortex (OFC) (Ramnani & Owen, 2004; Wallis, 2007) and the anterior  
656 cingulate cortex (ACC) (Bush, Luu, & Posner, 2000; Carter et al., 1998). Arbitrary,  
657 meaningless decisions, in contrast, were mainly probed using variants of the Libet paradigm,  
658 showing activations in the Supplementary Motor Area (SMA), alongside other frontal areas  
659 like the medial frontal cortex (Brass & Haggard, 2008; Kriehoff, Waszak, Prinz, & Brass,  
660 2011) or the frontopolar cortex, as well as the posterior cingulate cortex (Fried et al., 2011;  
661 Soon et al., 2008) (though see Hughes, Schütz-Bosbach, and Waszak (2011), which suggests  
662 that a common mechanism may underlie both decision types). Possibly then, arbitrary and  
663 deliberate decisions may differ not only with respect to the RP, but be subserved by different  
664 underlying neural circuits, which makes generalization from one class of decisions to the other  
665 more difficult. Deliberate decisions are associated with more lateralized and central neural  
666 activity while arbitrary ones are associated with more medial and frontal ones. This appears to  
667 align with the different brain regions associated with the two decision types above, as also  
668 evidenced by the differences we found between the scalp distributions of arbitrary and  
669 deliberate decisions (Fig. 3A). Further studies are needed to explore this potential divergence  
670 in the neural regions between the two decision types.

671 To be clear, and following the above, we do not claim that the RP captures all unconscious  
672 processes that precede conscious awareness. However, some have suggested that the RP  
673 represents unconscious motor-preparatory activity before any kind of decision (e.g., Libet,  
674 1985). But our results provide evidence against that claim, as we do not find an RP before  
675 deliberate decisions, which also entail motor preparation. What is more, in deliberate decisions  
676 in particular, it is likely that there are neural precursors of upcoming actions—possibly  
677 involving the above neural circuits as well as circuits that represents values—which are  
678 unrelated to the RP. Note also that we did not attempt to separately measure the timing of  
679 subjects' conscious decision to move. Rather, we instructed them to hold their hands above the  
680 relevant keyboard keys and press their selected key as soon as they made up their mind. This  
681 was both to keep the decisions in this task more ecological and because we think that the key  
682 method of measuring decision onset (using some type of clock to measure Libet's W-time) is  
683 highly problematic (see Methods). Some might also claim that unconscious decision-making  
684 could explain our results, suggesting that in arbitrary decisions subjects engage in unconscious  
685 deliberation or in actively inhibiting their urge to follow their preference as well as in free  
686 choice, while in deliberate decisions only deliberation is required. But this interpretation is  
687 unlikely because the longer RTs in deliberate decisions suggest, if anything, that more complex  
688 mental processes (conscious or unconscious) took place before deliberate and not arbitrary  
689 decisions. What is more, these interpretations should impede our chances of finding the RP in  
690 arbitrary trials (as the design diverges from the original Libet task), yet the RP was present,  
691 rendering them less plausible.

692 Aside from highlighting the neural differences between arbitrary and deliberate decisions, this  
693 study also challenges a common interpretation of the function of the RP. If the RP is not  
694 present before deliberate action, it does not seem to be a necessary link in the general causal  
695 chain leading to action. Schurger et al. (2012) suggested that the RP reflects the accumulation  
696 of stochastic fluctuations in neural activity that lead to action, following a threshold crossing,  
697 when humans arbitrarily decide to move. According to that model, the shape of the RP results  
698 from the manner in which it is computed: averaged over trials that are locked to response onset

699 (that directly follows the threshold crossing). Our results and our model are in line with that  
700 interpretation and expand upon it, suggesting that the RP represents the accumulation of noisy,  
701 random fluctuations that drive arbitrary decisions, while deliberate decisions are mainly driven  
702 by the values associated with the decision alternatives (Maoz et al., 2013).

703 Our drift-diffusion model was based on the assumption that every decision can be driven by a  
704 component based on the values of the decision alternatives (i.e., subjects' support for the two  
705 NPOs we presented) or by another component representing noise—random fluctuations in  
706 neural activity. The value component plays little to no role in arbitrary decisions, so action  
707 selection and timing depend on when the accumulation of noise crosses the decision threshold  
708 for the congruent and incongruent decision alternatives. In deliberate decisions, in contrast, the  
709 value component drives the decisions, while the noise component plays little to no role. Thus,  
710 in arbitrary decisions, action onset closely tracks threshold crossings of the noise component.  
711 But, in deliberate decisions, the noise component reaches a random level and is then stopped;  
712 so, the value component drives the decision. Hence, locking the ERP to response onset and  
713 averaging over trials to obtain the RP leads to slight slope for deliberate decisions but to the  
714 expected RP shape in arbitrary decisions. This provides strong evidence that the RP does not  
715 reflect subconscious movement preparation. Rather, it is induced by threshold crossing of  
716 random fluctuations in arbitrary decisions, which do not drive deliberate decisions;  
717 accordingly, the RP is not found there. Further studies of the causal role of consciousness in  
718 deliberate versus arbitrary decisions are required to test this claim.

719 Nevertheless, two possible, alternative explanations of our results can be raised. First, one  
720 could claim that—in the deliberate condition only—the NPO names act as a cue, thereby  
721 turning what we term internal, deliberate decisions into no more than simple responses to  
722 external stimuli. Under this account, if the preferred NPO is on the right, it is immediately  
723 interpreted as “press right”. It would therefore follow that subjects are actually not making  
724 decisions in deliberate trials, which in turn is reflected by the absence of the RP in those trials.  
725 However, the reaction time and consistency results that we obtained provide evidence against  
726 this interpretation. We found longer reaction times for hard-deliberate decisions than for easy-  
727 deliberate ones (2.52 versus 2.13 s, on average, respectively; Fig. 2 left) and higher  
728 consistencies with the initial ratings for easy-deliberate decisions than for hard-deliberate  
729 decisions (0.99 versus 0.83, on average, respectively; Fig. 2 right). If the NPO names acted as  
730 mere cues, we would have expected no differences between reaction times or consistencies for  
731 easy- and hard-deliberate decisions. In addition, there were 50 different causes in the first part  
732 of the experiment. So, it is highly unlikely that subjects could memorize all 1225 pairwise  
733 preferences among these causes and simply transform any decision between a pair of causes  
734 into a stimulus instructing to press left or right.

735 Another alternative interpretation of our results is that subjects engage in (unconscious)  
736 deliberation also during arbitrary decisions (Tusche, Bode, & Haynes, 2010), as they are trying  
737 to find a way to break the symmetry between the two possible actions. If so, the RP in the  
738 arbitrary decisions might actually reflect the extra effort in those types of decisions, which is  
739 not found in deliberate decisions. However, this interpretation entails a longer reaction time for  
740 arbitrary than for deliberate decisions, because of the heavier cognitive load, which is the  
741 opposite of what we found (Fig. 2A). Under this interpretation, we would also expect the  
742 simpler deliberation in arbitrary-easy trials to result in a shorter reaction-time than that of  
743 arbitrary-hard. But this is not what we find (Fig. 2A).

744 In conclusion, our study suggests that RPs do not precede deliberate decisions or is at least  
745 strongly diminished before such decisions. In addition, it suggests that RPs represent an  
746 artificial accumulation of random fluctuations rather than serving a genuine marker of an

747 unconscious decision to initiate voluntary movement. This further motivates future  
748 investigations into other precursors of action besides the RP using EEG, fMRI, or other  
749 techniques. It also highlights that it would be of particular interest to find the neural activity  
750 that precedes deliberate decisions. And it would also be of interest to find neural activity,  
751 which is not motor activity, that is common to both deliberate and arbitrary decisions.

## 752 **Materials and Methods**

### 753 *Subjects*

754 Twenty healthy subjects participated in the study. They were California Institute of  
755 Technology (Caltech) students as well as members of the Pasadena community. All subjects  
756 had reported normal or corrected-to-normal sight and no psychiatric or neurological history.  
757 They volunteered to participate in the study for payment (\$20 per hour). Subjects were  
758 prescreened to include only participants who were socially involved and active in the  
759 community (based on the strength of their support of social causes, past volunteer work, past  
760 donations to social causes, and tendency to vote). The data from 18 subjects was analyzed; two  
761 subjects were excluded from our analysis (see *Sample size and exclusion criteria* below). The  
762 experiment was approved by Caltech's Institutional Review Board (14-0432; Neural markers  
763 of deliberate and random decisions), and informed consent was obtained from all participants  
764 after the experimental procedures were explained to them.

### 765 *Sample size and exclusion criteria*

766 We ran a power analysis based on the findings of Haggard and Eimer (1999). Their RP in a  
767 free left/right-choice task had a mean of 5.293  $\mu\text{V}$  and standard deviation of 2.267  $\mu\text{V}$ . Data  
768 from a pilot study we ran before this experiment suggested that we might obtain smaller RP  
769 values in our task (they referenced to the tip of the nose and we to the average of all channels,  
770 which typically results in a smaller RP). Therefore, we conservatively estimated the magnitude  
771 of our RP as half of that of Haggard & Eimer, 2.647  $\mu\text{V}$ , while keeping the standard deviation  
772 the same at 2.267  $\mu\text{V}$ . Our power analysis therefore suggested that we would need at least 16  
773 subjects to reliably find a difference between an RP and a null RP (0  $\mu\text{V}$ ) at a p-value of 0.05  
774 and power of 0.99. This number agreed with our pilot study, where we found that a sample size  
775 of at least 16 subjects resulted in a clear, averaged RP. Following the above reasoning, we  
776 decided beforehand to collect 20 subjects for this study, taking into account that some could be  
777 excluded as they would not meet the following predefined inclusion criteria: at least 30 trials  
778 per experimental condition remaining after artifact rejection; and averaged RTs (across  
779 conditions) that deviated by less than 3 standard deviations from the group mean.

780 Subjects were informed about the overall number of subjects that would participate in the  
781 experiment when the NPO lottery was explained to them (see below). So, we had to finalize  
782 the overall number of subjects who would participate in the study—but not necessarily the  
783 overall number of subjects whose data would be part of the analysis—before the experiment  
784 began. After completing data collection, we ran only the EEG preprocessing and behavioral-  
785 data analysis to test each subject against the exclusion criteria. This was done before we looked  
786 at the data with respect to our hypothesis or research question. Two subjects did not meet the  
787 inclusion criteria: the data of one subject (#18) suffered from poor signal quality, resulting in  
788 less than 30 trials remaining after artifact rejection; another subject (#12) had RTs longer than  
789 3 standard deviations from the mean. All analyses were thus run on the 18 remaining subjects.

### 790 *Stimuli and apparatus*

791 Subjects sat in a dimly lit room. The stimuli were presented on a 21” Viewsonic G225f (20”  
792 viewable) CRT monitor with a 60-Hz refresh rate and a 1024×768 resolution using  
793 Psychtoolbox version 3 and Mathworks Matlab 2014b (Brainard, 1997; Pelli, 1997). They  
794 appeared with a gray background (RGB values: [128, 128,128]). The screen was located 60 cm  
795 away from subjects' eyes. Stimuli included names of 50 real, non-profit organizations (NPOs).  
796 Twenty organizations were consensual (e.g., the Cancer Research Institute, or the Hunger  
797 project), and thirty were more controversial: we chose 15 causes that were widely debated  
798 (e.g., pro/anti guns, pro/anti abortions), and selected one NPO that supported each of the two  
799 sides of the debate. This was done to achieve variability in subjects’ willingness to donate to  
800 the different NPOs. In the main part of the experiment, succinct descriptions of the causes  
801 (e.g., pro-marijuana legalization, pro-child protection; for a full list of NPOs and causes see  
802 Supplementary Table 1) were presented in black Comic Sans MS.

### 803 *Study Design*

804 The objective of this study was to compare ERPs elicited by arbitrary and deliberate decision-  
805 making, and in particular the RP. We further manipulated decision difficulty to validate our  
806 manipulation of decisions type: we introduced hard and easy decisions which corresponded to  
807 small and large differences between subjects’ preferences for the pairs of presented NPOs,  
808 respectively. We reasoned that if the manipulation of decision type (arbitrary vs. deliberate)  
809 was effective, there would be behavioral differences between easy and hard decisions for  
810 deliberate choices but not for arbitrary choices (because differences in preferences should not  
811 influence subjects’ arbitrary decisions). Our 2 x 2 design was therefore decision type (arbitrary  
812 vs. deliberate) by decision difficulty (easy vs. hard). Each condition included 90 trials,  
813 separated into 10 blocks of 9 trials each, resulting in a total of 360 trials and 40 blocks. Blocks  
814 of different decision types were randomly intermixed. Decision difficulty was randomly  
815 counterbalanced across trials within each block.

### 816 *Experimental Procedure*

817 In the first part of the experiment, subjects were presented with each of the 50 NPOs and the  
818 causes with which the NPOs were associated separately (see Supplementary Table 1). They  
819 were instructed to rate how much they would like to support that NPO with a \$1000 donation  
820 on a scale of 1 (“I would not like to support this NPO at all) to 7 (“I would very much like to  
821 support this NPO”). No time pressure was put on the subjects, and they were given access to  
822 the website of each NPO to give them the opportunity to learn more about the NPO and the  
823 cause it supports.

824 After the subjects finished rating all NPOs, the main experiment began. In each block of the  
825 experiment, subjects made either deliberate or arbitrary decisions. Two succinct cause  
826 descriptions, representing two actual NPOs, were presented in each trial (Fig. 1). In deliberate  
827 blocks, subjects were instructed to choose the NPO to which they would like to donate \$1000  
828 by pressing the <Q> or <P> key on the keyboard, using their left and right index finger, for the  
829 NPO on the left or right, respectively, as soon as they decided. Subjects were informed that at  
830 the end of each block one of the NPOs they chose would be randomly selected to advance to a  
831 lottery. Then, at the end of the experiment, the lottery will take place and the winning NPO  
832 will receive a \$20 donation. In addition, that NPO will advance to the final, inter-subject  
833 lottery, where one subject’s NPO will be picked randomly for a \$1000 donation. It was  
834 stressed that the donations were real and that no deception was used in the experiment. To  
835 persuade the subjects that the donations were real, we presented a signed commitment to  
836 donate the money, and promised to send them the donation receipts after the experiment. Thus,

837 subjects knew that in deliberate trials, every choice they made was not hypothetical, and could  
838 potentially lead to an actual \$1020 donation to their chosen NPO.

839 Arbitrary trials were identical to deliberate trials except for the following crucial differences.  
840 Subjects were told that, at the end of each block, the pair of NPOs in one randomly selected  
841 trial would advance to the lottery together. And, if that pair wins the lottery, both NPOs would  
842 receive \$10 (each). Further, the NPO pair that would win the inter-subject lottery would  
843 receive a \$500 donation each. Hence it was stressed to the subjects that there was no reason for  
844 them to prefer one NPO over the other in arbitrary blocks, as both NPOs would receive the  
845 same donation regardless of their button press. Subjects were told to therefore simply press  
846 either <Q> or <P> as soon as they decided to do so.

847 Thus, while subjects' decisions in the deliberate blocks were meaningful and consequential,  
848 their decisions in the arbitrary blocks had no impact on the final donations that were made. In  
849 these trials, subjects were further urged not to let their preferred NPO dictate their response.  
850 Importantly, despite the difference in decision type between deliberate and arbitrary blocks, the  
851 instructions for carrying out the decisions were identical: Subjects were instructed to report  
852 their decisions as soon as they made them in both conditions. They were further asked to place  
853 their right and left index fingers on the response keys, so they could respond as quickly as  
854 possible. Note that we did not ask subjects to report their "W-time" (time of consciously  
855 reaching a decision), because this measure was shown to rely on neural processes occurring  
856 after response onset (Lau, Rogers, & Passingham, 2007) and to potentially be backward  
857 inferred from movement time (Banks & Isham, 2009). Even more importantly, clock  
858 monitoring was demonstrated to have an effect on RP size (Miller et al., 2011), so it could  
859 potentially confound our results (Maoz et al., 2015).

860 Decision difficulty (Easy/Hard) was manipulated throughout the experiment, randomly  
861 intermixed within each block. Decision difficulty was determined based on the rating  
862 difference between the two presented NPOs. NPO pairs with 1 or at least 4 rating-point  
863 difference were designated hard or easy, respectively. Based on each subject's ratings, we  
864 created a list of NPO pairs, half of each were easy choices and the other half hard choices.

865 Each block started with an instruction written either in dark orange (Deliberate: "In this block  
866 choose the cause to which you want to donate \$1000") or in blue (Arbitrary: "In this block  
867 both causes may each get a \$500 donation regardless of the choice") on a gray background that  
868 was used throughout the experiment. Short-hand instructions appeared at the top of the screen  
869 throughout the block in the same colors as that block's initial instructions; Deliberate: "Choose  
870 for \$1000" or Arbitrary: "Press for \$500 each" (Fig. 1).

871 Each trial started with the gray screen that was blank except for a centered, black fixation  
872 cross. The fixation screen was on for a duration drawn from a uniform distribution between 1  
873 and 1.5 s. Then, the two cause-descriptions appeared on the left and right side of the fixation  
874 cross (left/right assignments were randomly counterbalanced) and remained on the screen until  
875 the subjects reported their decisions with a key press—<Q> or <P> on the keyboard for the  
876 cause on the left or right, respectively. The cause corresponding to the pressed button then  
877 turned white for 1 s, and a new trial started immediately. If subjects did not respond within 20  
878 s, they received an error message and were informed that, if this trial would be selected for the  
879 lottery, no NPO would receive a donation. However, this did not happen for any subject on any  
880 trial.

881 To assess the consistency of subjects' decisions during the main experiment with their ratings  
882 in the first part of the experiment, subjects' choices were coded in the following way: each



883 binary choice in the main experiment was given a consistency grade of 1, if subjects chose the  
884 NPO that was rated higher in the rating session, and 0 if not. Then an averaged consistency  
885 grade for each subject was calculated as the mean consistency grade over all the choices. Thus,  
886 a consistency grade of 1 indicates perfect consistency with one's ratings across all trials, 0 is  
887 perfect inconsistency, and 0.5 is chance performance.

888 We wanted to make sure subjects were carefully reading and remembering the causes also  
889 during the arbitrary trials to better equate memory load, attention, and other cognitive aspects  
890 between deliberate and arbitrary decisions—except those aspects directly associated with the  
891 decision type, which was the focus of our investigation. We therefore randomly interspersed 36  
892 memory catch-trials throughout the experiment (thus more than one catch trial could occur per  
893 block). On such trials, four succinct descriptions of causes were presented, and subjects had to  
894 select the one that appeared in the previous trial. A correct or incorrect response added or  
895 subtracted 50 cents from their total, respectively. (Subjects were informed that if they reached  
896 a negative balance, no money will be deducted off their payment for participation in the  
897 experiment.) Thus, subjects could earn \$18 more for the experiment, if they answered all  
898 memory test questions correctly. Subjects typically did well on these memory questions, on  
899 average erring in 2.5 out of 36 memory catch trials (7% error) and gaining additional \$16.75  
900 (SD=3.19). Subjects' error rates in the memory task did not differ significantly between the  
901 experimental conditions (2-way ANOVA; decision type:  $F(1,17)=2.51$ ,  $p=0.13$ ; decision  
902 difficulty:  $F(1,17)=2.62$ ,  $p=0.12$ ; interaction:  $F(1,17)=0.84$ ,  $p=0.37$ ).

### 903 *ERP recording methods*

904 The EEG was recorded using an Active 2 system (BioSemi, the Netherlands) from 64  
905 electrodes distributed based on the extended 10–20 system and connected to a cap, and seven  
906 external electrodes. Four of the external electrodes recorded the EOG: two located at the outer  
907 canthi of the right and left eyes and two above and below the center of the right eye. Two  
908 external electrodes were located on the mastoids, and one electrode was placed on the tip of the  
909 nose. All electrodes were referenced during recording to a common-mode signal (CMS)  
910 electrode between POz and PO3. The EEG was continuously sampled at 512 Hz and stored for  
911 offline analysis.

### 912 *ERP analysis*

913 ERP analysis was conducted using the “Brain Vision Analyzer” software (Brain Products,  
914 Germany) and in-house Mathworks Matlab scripts. Data from all channels were referenced  
915 offline to the average of all channels, which is known to result in a reduced-amplitude RP  
916 (because the RP is such a spatially diffuse signal). The data were then digitally high-pass  
917 filtered at 0.1 Hz using a Finite Impulse Response (FIR) filter to remove slow drifts. A notch  
918 filter at 59–61 Hz was applied to the data to remove 60-Hz electrical noise. The signal was then  
919 cleaned of blink and saccade artifacts using Independent Component Analysis (ICA)  
920 (Junghofer, Elbert, Tucker, & Rockstroh, 2000). Signal artifacts were detected as amplitudes  
921 exceeding  $\pm 100 \mu\text{V}$ , differences beyond  $100 \mu\text{V}$  within a 200 ms interval, or activity below  
922  $0.5 \mu\text{V}$  for over 100 ms (the last condition was never found). Sections of EEG data that  
923 included such artifacts in any channel were removed (150 ms before and after the artifact). We  
924 further excluded single trials in which subjects pressed the wrong button as well as trials where  
925 subjects' RTs were less than 200 ms, more than 10s, or more than 3 standard deviations away  
926 from that subject's mean in that condition (mean number of excluded trials = 7.17, SD=2.46,  
927 which are 1.99% of the trials). Overall, the average number of included trials in each  
928 experimental cell was 70.38 trials with a range of 36–86 out of 90 trials per condition. Channels  
929 that consistently had artifacts were replaced using interpolation (4.2 channels per subject, on

930 average). No significant differences were found in the number of excluded trials across  
931 conditions (2-way ANOVA; decision type:  $F(1,17)=3.31$ ,  $p=0.09$ ; decision difficulty:  
932  $F(1,17)=1.83$ ,  $p=0.19$ ; interaction:  $F(1,17)=0.42$ ,  $p=0.53$ ).

933 The EEG was segmented by locking the waveforms to subjects' movement onset, starting 2s  
934 prior to the movement and ending 0.2s afterwards, with the segments averaged separately for  
935 each decision type (Deliberate/Arbitrary x Easy/Hard) and decision content (right/left). The  
936 baseline period was defined as the time window between -1000 ms and -500 ms prior to  
937 *stimulus* onset, that is, the onset of the causes screen, rather than prior to movement onset. In  
938 addition to the main baseline, we tested another baseline—from -1000 ms to -500 ms relative  
939 to *movement* onset—to investigate whether the baseline period influenced our main results (see  
940 Results). Furthermore, we segmented the EEG based on *stimulus* onset, using the same  
941 baseline, for stimulus-locked analysis (again, see Results).

942 To assess potential effects of eye movements during the experiment, we defined the radial eye  
943 signal as the average over all 4 EOG channels, when band-pass filtered to between 30 and 100  
944 Hz. We then defined a saccade as any signal that was more than 2.5 standardized IQRs away  
945 from the median of the radial signal for more than 2 ms. Two consecutive saccades had to be at  
946 least 50 ms apart. The saccade count (SC) was the number of saccades during the last 500 ms  
947 before response onset (Keren, Yuval-Greenberg, & Deouell, 2010) (see also (Croft & Barry,  
948 2000; Elbert, Lutzenberger, Rockstroh, & Birbaumer, 1985; Shan, Moster, & Roemer, 1995)).

#### 949 *Statistical Analysis*

950 EEG differences greater than expected by chance were assessed using two-way ANOVAs with  
951 decision type (deliberate, arbitrary) and decision difficulty (easy, hard), using IBM SPSS  
952 statistics, version 24. For both RP and LRP signals, the mean amplitude from 500 ms before to  
953 button-press onset were used for the ANOVAs. Greenhouse–Geisser correction was never  
954 required as sphericity was never violated (Picton et al., 2000).

955 Trend analysis on all subjects' data was carried out by regressing the voltage for every subject  
956 against time for the last 1000 ms before response onset using first-order polynomial linear  
957 regression (see Results). We used every 10<sup>th</sup> time sample for the regression (i.e., the 1<sup>st</sup>, 11<sup>th</sup>,  
958 21<sup>st</sup>, 31<sup>st</sup> samples, and so on) to conform with the individual-subject analysis (see below). For  
959 the individual-subject analysis, the voltage on all trials was regressed against time in the same  
960 manner (i.e., for the last 1000 ms before response onset and using first-order polynomial linear  
961 regression). As individual-trial data is much noisier than the mean over all trials in each  
962 subject, we opted for standard robust-regression using iteratively reweighted least squares  
963 (implemented using the *robustfit()* function in Mathworks Matlab). The iterative robust-  
964 regression procedure is time consuming. So, we used every 10<sup>th</sup> time sample instead of every  
965 sample to make the procedure's run time manageable. Also, as EEG signals have a 1/f power  
966 spectrum, taking every 10<sup>th</sup> sample further better conforms with the assumption of i.i.d. noise  
967 in linear regression.

968 We further conducted Bayesian analyses of our main results. This allowed us to assess the  
969 strength of the evidence for or against the existence of an effect, and specifically test whether  
970 null results stem from genuine absence of an effect or from insufficient or underpowered data.  
971 Specifically, the Bayes factor allowed us to compare the probability of observing the data  
972 given  $H_0$  (i.e., no RP in deliberate decisions) against the probability of observing the data given  
973  $H_1$  (i.e., RP exists in deliberate decisions). We followed the convention that a  $BF < 0.33$   
974 implies substantial evidence for lack of an effect (that is, the data is at least three times more  
975 likely to be observed given  $H_0$  than given  $H_1$ ),  $0.33 < BF < 3$  suggests insensitivity of the data,

976 and  $BF > 3$  denotes substantial evidence for the presence of an effect ( $H_1$ ) (Jeffreys, 1998).  
977 Bayesian analysis was carried out using JASP (ver. 0.8; default settings).

978 In addition to the above, we used the cluster-based nonparametric method developed by Maris  
979 and Oostenveld to find continuous temporal windows where EEG activity was reliably  
980 different from 0 (Maris & Oostenveld, 2007). We used an in-house implementation of the  
981 method in Mathworks Matlab with a threshold of 2 on the  $t$  statistic and with a significance  
982 level of  $p = 0.05$ .

### 983 *Model and Simulations*

984 All simulations were performed using Mathworks Matlab 2018b. The model was devised off  
985 the one proposed by Schurger et al. (2012). Like them, we built a drift-diffusion model  
986 (Ratcliff, 1978; Usher & McClelland, 2001), which included a leaky stochastic accumulator  
987 (with a threshold on its output) and a time-locking/epoching procedure. The original model  
988 amounted to iterative numerical integration of the differential equation

$$\delta x_i = (I - kx_i)\Delta t + c\xi_i\sqrt{\Delta t} \quad (1)$$

989 where  $I$  is the drift rate,  $k$  is the leak (exponential decay in  $x$ ),  $\xi$  is Gaussian noise, and  $c$  is a  
990 noise-scaling factor (we used  $c = 0.05$ ).  $\Delta t$  is the discrete time step used in the simulation (we  
991 used  $\Delta t = 0.001$ , similar to our EEG sampling rate). The model integrates  $x_i$  until it crosses a  
992 threshold, which represents a decision having been made.

993 In such drift-diffusion models, for a given  $k$  and  $c$ , the values of  $I$  and the threshold together  
994 determine how quickly a decision will be reached, on average. If we further fix the threshold, a  
995 higher drift rate,  $I$ , represents a faster decision, on average. The drift rate alone can thus be  
996 viewed as a constant “urgency to respond” (using the original Schurger term) that is inherent in  
997 the demand characteristics of the task, evidenced by the fact that no subject took more than 20  
998 s to make a decision on any trial. The leak term,  $k$ , ensures that the model would not be too  
999 linear; i.e., it prevented the drift rate from setting up a linear trajectory for the accumulator  
1000 toward the threshold. Also,  $k$  has a negative sign and is multiplied by  $x_i$ . So,  $kx_i$  acts against the  
1001 drift induced by  $I$  and gets stronger as  $x_i$  grows. Hence, due to the leak term, doubling the  
1002 height of the threshold could make the accumulator rarely reach the threshold instead of  
1003 reaching it in roughly twice the amount of time (up to the noise term).

1004 When comparing the model’s activity on the SMA and on Region X, we needed to know how  
1005 to set the drift rate for the DDM in the Region X for deliberate decisions. We made the  
1006 assumption that the ratio between the drift rate in Region X and in the SMA during deliberate  
1007 decisions would be the same as the ratio between the average actual activity in the SMA and in  
1008 the rest of the brain during arbitrary decisions. Our EEG data suggested that this ratio  
1009 (calculated as activity in  $C_z$  divided by the mean activity in the rest of the electrodes) is 1.45.  
1010 Hence, we set the drift rate in Region X to be 1.45 times smaller than that of the SMA (see  
1011 Table 1 for the drift values in the SMA).

1012 Our model differed from Schurger’s in two main ways. First, it accounted for both arbitrary  
1013 and deliberate decisions and was thus built to fit our empirical results. We devised a model that  
1014 was composed of two distinct components (Fig. 8A), each described by a race to threshold  
1015 between 2 DDMs based on Eq. (1) (see below), but with different parameter values for each  
1016 DDM (Table 1). The first component accumulated activity that drove arbitrary decisions (i.e.,

017 random fluctuations (Schurger et al., 2012)). Such model activation reflects the neural activity  
018 that might be recorded over the  $C_z$  electrode. We term this component of the model the *Noise*  
019 component. The second component of the model reflects brain activity that drives deliberate  
020 decisions, based on the values that subjects associated with the decision alternatives. We term  
021 this second component the *Value* component. Our model relied on its noise component to  
022 reflect arbitrary decisions and on its value component to reflect deliberate decisions.

023 **Table 1: Values of the model's drift-rate parameter across decision types in the**  
024 **SMA.** Values of the drift-rate parameter,  $I$ , in our model across (deliberate, arbitrary) x  
025 (easy, hard) decisions x (congruent, incongruent) decision alternatives. Values in  
026 Region X are 1.45 times smaller than in this table for each entry.

| Drift rate ( $I$ )<br>values | Congruent |        | Incongruent |        |
|------------------------------|-----------|--------|-------------|--------|
|                              | Easy      | Hard   | Easy        | Hard   |
| Deliberate                   | 0.0400    | 0.0396 | 0.0000      | 0.0228 |
| Arbitrary                    | 0.1648    | 0.1650 | 0.1566      | 0.1650 |

027 A second difference between our model and Schurger and colleagues' is that theirs modeled  
028 only the decision *when* to move (during arbitrary decisions). As those were the only decisions  
029 that their subjects faced. But our subjects decided both *when* and *which hand* to move. So, we  
030 had to extend the Schurger model in that respect as well. We did this using a race-to-threshold  
031 mechanism between the two decision alternatives. In our empirical paradigm, the difference in  
032 rating of the two causes was either 1 (for hard decisions) or 4-6 (for easy decisions; see  
033 "Experimental Procedure" in Methods), so there was always an alternative that was ranked  
034 higher than the other. Choosing the higher- or lower-ranked alternative was termed a congruent  
035 or incongruent choice with respect to the initial ratings, respectively. Hence, we modeled each  
036 decision the subjects made as a race to threshold between the congruent and incongruent  
037 alternatives in the noise component (for arbitrary decisions) or value component (for deliberate  
038 ones).

039 Using a parameter sweep, we found the values of the thresholds, drift rate, and leak that best fit  
040 our average empirical reaction times for (easy, hard) x (deliberate, arbitrary) decisions as well  
041 as our empirical consistency ratios for those 4 decision types. The model's reaction time was  
042 defined as the overall time that it took until the first threshold crossing in the race-to-threshold  
043 pair (again, each step took  $\Delta t = 0.001$  s). We used the same threshold value of 0.15 and leak  
044 value of  $k=0.5$  for all model types. The only parameter that was modulated across (deliberate,  
045 arbitrary) x (easy, hard) decisions x (congruent, incongruent) decision alternatives was the drift  
046 rate,  $I$  (Table 1). All of these parameters were then fixed when we used the model to derive the  
047 simulated  $C_z$  activity across all conditions.

048 Each simulation consisted of either 120 runs of the model, equal to the number of empirical  
049 trials per condition, or 10000 runs of the model for a smoother reaction-time distribution for  
050 the model (see Results). For each run of the model, we identified the first threshold crossing  
051 point and extracted the last second (1000 steps) before the crossing in each run. If the first  
052 crossing was earlier than sample no. 1,000 by  $n > 0$  samples, we padded the beginning of the  
053 epoch with  $n$  null values (NaN or "not-a-number" in Matlab). These values did not contribute  
054 to the average across simulated trials, so the simulated average RP became noisier at earlier  
055 time points in the epoch. Hence, our model was similarly limited to the Schurger model in its  
056 inability to account for activity earlier than the beginning of the trial (see Results).

057 **References**

- 058 Banks, W. P., & Isham, E. A. (2009). We infer rather than perceive the moment we decided to  
059 act. *Psychological Science*, 20(1), 17.
- 060 Bode, S., & Haynes, J. (2009). Decoding sequential stages of task preparation in the human  
061 brain. *Neuroimage*, 45(2), 606-613.
- 062 Bode, S., He, A., Soon, C., Trampel, R., Turner, R., & Haynes, J. (2011). Tracking the  
063 unconscious generation of free decisions using ultra-high field fMRI. *PLoS One*, 6(6),  
064 e21612.
- 065 Brainard, D. H. (1997). The psychophysics toolbox. *Spatial vision*, 10, 433-436.
- 066 Brass, M., & Haggard, P. (2008). The what, when, whether model of intentional action. *The*  
067 *Neuroscientist*, 14(4), 319.
- 068 Breitmeyer, B. G. (1985). Problems with the psychophysics of intention. *Behavioral and brain*  
069 *sciences*, 8(04), 539-540.
- 070 Bush, G., Luu, P., & Posner, M. I. (2000). Cognitive and emotional influences in anterior  
071 cingulate cortex. *Trends in Cognitive Sciences*, 4(6), 215-222.
- 072 Carter, C. S., Braver, T. S., Barch, D. M., Botvinick, M. M., Noll, D., & Cohen, J. D. (1998).  
073 Anterior cingulate cortex, error detection, and the online monitoring of performance.  
074 *Science*, 280(5364), 747-749.
- 075 Croft, R. J., & Barry, R. J. (2000). Removal of ocular artifact from the EEG: a review.  
076 *Neurophysiologie Clinique/Clinical Neurophysiology*, 30(1), 5-19.
- 077 Deutschländer, R., Pauen, M., & Haynes, J.-D. (2017). Probing folk-psychology: Do Libet-  
078 style experiments reflect folk intuitions about free action? *Consciousness and*  
079 *cognition*, 48, 232-245.
- 080 Eimer, M. (1998). The lateralized readiness potential as an on-line measure of central response  
081 activation processes. *Behavior Research Methods, Instruments, & Computers*, 30(1),  
082 146-156.
- 083 Elbert, T., Lutzenberger, W., Rockstroh, B., & Birbaumer, N. (1985). Removal of ocular  
084 artifacts from the EEG—a biophysical approach to the EOG. *Electroencephalography*  
085 *and Clinical Neurophysiology*, 60(5), 455-463.
- 086 Fischer, J. M. (1999). Recent work on moral responsibility. *Ethics*, 110(1), 93-139.
- 087 Frankfurt, H. G. (1971). Freedom of the Will and the Concept of a Person. *The Journal of*  
088 *Philosophy*, 68(1), 5-20.
- 089 Fried, I., Mukamel, R., & Kreiman, G. (2011). Internally generated preactivation of single  
090 neurons in human medial frontal cortex predicts volition. *Neuron*, 69, 548-562.
- 091 Frith, C., Blakemore, S., & Wolpert, D. (2000). Abnormalities in the awareness and control of  
092 action. *Philosophical Transactions of the Royal Society B: Biological Sciences*,  
093 355(1404), 1771.
- 094 Frith, C. D., & Haggard, P. (2018). Volition and the Brain—Revisiting a Classic Experimental  
095 Study. *TRENDS in Neurosciences*, 41(7), 405-407.
- 096 Gold, J., & Shadlen, M. (2007). The neural basis of decision making.
- 097 Haggard, P. (2005). Conscious intention and motor cognition. *Trends in Cognitive Sciences*,  
098 9(6), 290-295.
- 099 Haggard, P. (2008). Human volition: towards a neuroscience of will. *Nature Reviews*  
100 *Neuroscience*, 9(12), 934-946.
- 101 Haggard, P., & Eimer, M. (1999). On the relation between brain potentials and the awareness  
102 of voluntary movements. *Experimental Brain Research*, 126(1), 128-133.
- 103 Hallett, M. (2007). Volitional control of movement: The physiology of free will. *Clinical*  
104 *Neurophysiology*, 118(6), 1179-1192.
- 105 Hallett, M. (2016). Physiology of free will. *Annals of neurology*, 80(1), 5-12.
- 106 Harris, S. (2012). *Free will*. New York, NY: Simon & Schuster, Inc.

- 107 Hobbes, T. (1994). *Leviathan: with selected variants from the Latin edition of 1668*: Hackett  
108 Publishing Company.
- 109 Hughes, G., Schütz-Bosbach, S., & Waszak, F. (2011). One action system or two? Evidence  
110 for common central preparatory mechanisms in voluntary and stimulus-driven actions.  
111 *Journal of Neuroscience*, 31(46), 16692-16699.
- 112 Jeannerod, M. (2006). *Motor cognition: What actions tell the self*: Oxford University Press.
- 113 Jeffreys, H. (1998). *The theory of probability*: OUP Oxford.
- 114 Junghofer, M., Elbert, T., Tucker, D., & Rockstroh, B. (2000). Statistical control of artifacts in  
115 dense array EEG/MEG studies. *Psychophysiology*, 37(04), 523-532.
- 116 Kable, J. W., & Glimcher, P. W. (2009). The neurobiology of decision: consensus and  
117 controversy. *Neuron*, 63(6), 733-745.
- 118 Keren, A. S., Yuval-Greenberg, S., & Deouell, L. Y. (2010). Saccadic spike potentials in  
119 gamma-band EEG: characterization, detection and suppression. *Neuroimage*, 49(3),  
120 2248-2263.
- 121 Kornhuber, H., & Deecke, L. (1990). Readiness for movement—the Bereitschafts potential-  
122 story. *Current Contents Life Sciences*, 33(4), 14.
- 123 Kriehoff, V., Waszak, F., Prinz, W., & Brass, M. (2011). Neural and behavioral correlates of  
124 intentional actions. *Neuropsychologia*, 49(5), 767-776.
- 125 Lau, H., Rogers, R., Haggard, P., & Passingham, R. (2004). Attention to intention. *Science*,  
126 303(5661), 1208.
- 127 Lau, H., Rogers, R., & Passingham, R. (2007). Manipulating the experienced onset of intention  
128 after action execution. *Journal of cognitive neuroscience*, 19(1), 81-90.
- 129 Lew, E., Chavarriaga, R., Silvoni, S., & Millán, J. d. R. (2012). Detection of self-paced  
130 reaching movement intention from EEG signals. *Frontiers in Neuroengineering*, 5, 13.
- 131 Libet, B. (1985). Unconscious cerebral initiative and the role of conscious will in voluntary  
132 action. *Behavioral and brain sciences*, 8, 529-539.
- 133 Libet, B., Gleason, C., Wright, E., & Pearl, D. (1983). Time of conscious intention to act in  
134 relation to onset of cerebral activity (readiness-potential): The unconscious initiation of  
135 a freely voluntary act. *Brain*, 106(3), 623.
- 136 Libet, B., Wright, E., & Gleason, C. (1982). Readiness-potentials preceding unrestricted  
137 'spontaneous' vs. pre-planned voluntary acts. *Electroencephalography and Clinical  
138 Neurophysiology*, 54(3), 322-335.
- 139 MacKinnon, C. D., Allen, D. P., Shiratori, T., & Rogers, M. W. (2013). Early and  
140 unintentional release of planned motor actions during motor cortical preparation. *PLoS  
141 One*, 8(5), e63417.
- 142 Maoz, U., Mudrik, L., Rivlin, R., Ross, I., Mamelak, A., & Yaffe, G. (2015). On reporting the  
143 onset of the intention to move. In A. R. Mele (Ed.), *Surrounding Free Will:  
144 Philosophy: Psychology, Neuroscience*: Oxford University Press.
- 145 Maoz, U., Rutishauser, U., Kim, S., Cai, X., Lee, D., & Koch, C. (2013). Predeliberation  
146 activity in prefrontal cortex and striatum and the prediction of subsequent value  
147 judgment. *Frontiers in neuroscience*, 7, 225.
- 148 Maoz, U., & Yaffe, G. (2015). What does recent neuroscience tell us about criminal  
149 responsibility? *Journal of Law and the Biosciences*, 3(1), 120-139.
- 150 Maris, E., & Oostenveld, R. (2007). Nonparametric statistical testing of EEG-and MEG-data.  
151 *Journal of neuroscience methods*, 164(1), 177-190.
- 152 Masaki, H., Wild-wall, N., Sangals, J., & Sommer, W. (2004). The functional locus of the  
153 lateralized readiness potential. *Psychophysiology*, 41(2), 220-230.
- 154 Mele, A. (2006). *Free will and luck*: Oxford University Press.
- 155 Mele, A. (2009). *Effective intentions: the power of conscious will*: Oxford University Press,  
156 USA.
- 157 Mele, A. (2015). *Surrounding free will: philosophy, psychology, neuroscience*: Oxford  
158 University Press.

- 159 Miller, J., Shepherdson, P., & Trevena, J. (2011). Effects of Clock Monitoring on  
160 Electroencephalographic Activity. *Psychological Science*, 22(1), 103-109.
- 161 Nahmias, E., Shepard, J., & Reuter, S. (2014). It's OK if 'my brain made me do it': People's  
162 intuitions about free will and neuroscientific prediction. *Cognition*, 133(2), 502-516.
- 163 Pelli, D. G. (1997). The VideoToolbox software for visual psychophysics: Transforming  
164 numbers into movies. *Spatial vision*, 10(4), 437-442.
- 165 Perez, O., Mukamel, R., Tankus, A., Rosenblatt, J. D., Yeshurun, Y., & Fried, I. (2015).  
166 Preconscious prediction of a driver's decision using intracranial recordings. *Journal of*  
167 *cognitive neuroscience*.
- 168 Picton, T., Bentin, S., Berg, P., Donchin, E., Hillyard, S., Johnson, R., . . . Rugg, M. (2000).  
169 Guidelines for using human event-related potentials to study cognition: recording  
170 standards and publication criteria. *Psychophysiology*, 37(02), 127-152.
- 171 Pockett, S., Banks, W. P., & Gallagher, S. (2009). *Does consciousness cause behavior?* : Mit  
172 Press.
- 173 Ramnani, N., & Owen, A. M. (2004). Anterior prefrontal cortex: insights into function from  
174 anatomy and neuroimaging. *Nature Reviews Neuroscience*, 5(3), 184-194.
- 175 Ratcliff, R. (1978). A theory of memory retrieval. *Psychological Review*, 85(2), 59-108.
- 176 Roskies, A. (2010). How Does Neuroscience Affect Our Conception of Volition? *Annual*  
177 *Review of Neuroscience*, 33, 109-130.
- 178 Roskies, A. (2012). How does the neuroscience of decision making bear on our understanding  
179 of moral responsibility and free will? *Current Opinion in Neurobiology*, 22(6), 1022-  
180 1026.
- 181 Salvaris, M., & Haggard, P. (2014). Decoding Intention at Sensorimotor Timescales. *PLoS*  
182 *One*, 9(2), e85100.
- 183 Sanfey, A., Loewenstein, G., McClure, S., & Cohen, J. (2006). Neuroeconomics: cross-  
184 currents in research on decision-making. *Trends in Cognitive Sciences*, 10(3), 108-116.
- 185 Sanfey, A., Rilling, J., Aronson, J., Nystrom, L., & Cohen, J. (2003). The neural basis of  
186 economic decision-making in the ultimatum game. *Science*, 300(5626), 1755-1758.
- 187 Schmidt, S., Jo, H.-G., Wittmann, M., & Hinterberger, T. (2016). 'Catching the waves'—slow  
188 cortical potentials as moderator of voluntary action. *Neuroscience & Biobehavioral*  
189 *Reviews*, 68, 639-650.
- 190 Schurger, A. (2018). Specific Relationship between the Shape of the Readiness Potential,  
191 Subjective Decision Time, and Waiting Time Predicted by an Accumulator Model with  
192 Temporally Autocorrelated Input Noise. *eNeuro*, 5(1), ENEURO. 0302-0317.2018.
- 193 Schurger, A., Sitt, J. D., & Dehaene, S. (2012). An accumulator model for spontaneous neural  
194 activity prior to self-initiated movement. *Proceedings of the National Academy of*  
195 *Sciences*, 109(42), E2904-E2913.
- 196 Shan, Y., Moster, M. L., & Roemer, R. A. (1995). The effects of time point alignment on the  
197 amplitude of averaged orbital presaccadic spike potential (SP).  
198 *Electroencephalography and Clinical Neurophysiology*, 95(6), 475-477.
- 199 Shibasaki, H., & Hallett, M. (2006). What is the Bereitschaftspotential? *Clinical*  
200 *Neurophysiology*, 117(11), 2341-2356.
- 201 Sinnott-Armstrong, W. (2014). *Moral Psychology: Free Will and Moral Responsibility* (Vol.  
202 4): Mit Press.
- 203 Sinnott-Armstrong, W., & Nadel, L. (Eds.). (2011). *Conscious will and responsibility: A*  
204 *tribute to Benjamin Libet*. Oxford University Press.
- 205 Sirigu, A., Daprati, E., Ciancia, S., Giraux, P., Nighoghossian, N., Posada, A., & Haggard, P.  
206 (2004). Altered awareness of voluntary action after damage to the parietal cortex.  
207 *Nature Neuroscience*, 7(1), 80-84.
- 208 Soon, C., Brass, M., Heinze, H., & Haynes, J. (2008). Unconscious determinants of free  
209 decisions in the human brain. *Nature Neuroscience*, 11(5), 543-545.

- 210 Soon, C., He, A., Bode, S., & Haynes, J. (2013). Predicting free choices for abstract intentions.  
211 *Proceedings of the National Academy of Sciences*, *110*(15), 6217-6222.
- 212 Strawson, G. (1994). The impossibility of moral responsibility. *Philosophical Studies*, *75*(1), 5-  
213 24.
- 214 Thut, G., Hauert, C.-A., Viviani, P., Morand, S., Spinelli, L., Blanke, O., . . . Michel, C.  
215 (2000). Internally driven vs. externally cued movement selection: a study on the timing  
216 of brain activity. *Cognitive Brain Research*, *9*(3), 261-269.
- 217 Trevena, J., & Miller, J. (2010). Brain preparation before a voluntary action: Evidence against  
218 unconscious movement initiation. *Consciousness and cognition*, *19*(1), 447-456.
- 219 Tusche, A., Bode, S., & Haynes, J. (2010). Neural responses to unattended products predict  
220 later consumer choices. *Journal of Neuroscience*, *30*(23), 8024-8031.
- 221 Ullmann-Margalit, E., & Morgenbesser, S. (1977). Picking and choosing. *Social Research*,  
222 *44*(4), 757-783.
- 223 Usher, M., & McClelland, J. L. (2001). The time course of perceptual choice: the leaky,  
224 competing accumulator model. *Psychological Review*, *108*(3), 550.
- 225 Verleger, R., Haake, M., Baur, A., & Śmigajewicz, K. (2016). Time to Move Again: Does the  
226 Bereitschaftspotential Covary with Demands on Internal Timing? *Frontiers in human*  
227 *neuroscience*, *10*.
- 228 Wallis, J. (2007). Orbitofrontal cortex and its contribution to decision-making. *Annu. Rev.*  
229 *Neurosci.*, *30*, 31-56.
- 230 Wallis, J., & Miller, E. (2003). Neuronal activity in primate dorsolateral and orbital prefrontal  
231 cortex during performance of a reward preference task. *Eur J Neurosci*, *18*(7), 2069-  
232 2081. doi:2922 [pii]
- 233 Waszak, F., Wascher, E., Keller, P., Koch, I., Aschersleben, G., Rosenbaum, D. A., & Prinz,  
234 W. (2005). Intention-based and stimulus-based mechanisms in action selection.  
235 *Experimental Brain Research*, *162*(3), 346-356.
- 236 Wegner, D. (2002). *The illusion of conscious will*: MIT Press.
- 237 Wisniewski, D., Goschke, T., & Haynes, J.-D. (2016). Similar coding of freely chosen and  
238 externally cued intentions in a fronto-parietal network. *Neuroimage*, *134*, 450-458.
- 239 Wolf, S. (1990). *Freedom within reason*: Oxford University Press.

240 **Acknowledgments:** We thank Ralph Adolphs for his invaluable guidance and support in  
241 designing and running the experiment as well as for very useful discussions of the results. We  
242 thank Ram Rivlin for various conceptual discussions about deliberate versus arbitrary decision-  
243 making and about the initial experimental paradigm design. We thank Caitlin Duncan for her  
244 help in patiently and meticulously gathering the EEG data. We thank Daw-An Wu for  
245 discussions about EEG data collection and preprocessing and for his help with actual data  
246 collection. We thank Daniel Grossman for his help in carefully preprocessing the data and  
247 suggesting potential interpretations of it. We thank Ueli Rutishauser for discussions about the  
248 model and its simulations. We thank Shlomit Yuval-Greenberg and Leon Deouell for  
249 important discussions about EEG processing and analysis. Last, we thank the anonymous  
250 reviewers for their invaluable comments, which greatly improved this manuscript. **Funding:**  
251 This research was supported by Florida State University's Big Questions in Free Will Initiative,  
252 funded by the John Templeton Foundation, to U.M., G.Y., and C.K.; by the Ralph Schlaeger  
253 Charitable Foundation to U.M.; by the Bial Foundation to U.M. and to U.M. and L.M.; and by  
254 the German-Israeli Foundation for Scientific Research and Development to L.M.. C.K. thanks  
255 the Allen Institute founders, Paul G. Allen and Jody Allen, for their vision, encouragement,  
256 and support. **Author contributions:** U.M., L.M., G.Y., and C.K. conceived the project and  
257 designed the experiments. L.M. and U.M. analyzed the results. U.M. designed and simulated  
258 the model. L.M. and U.M. wrote the manuscript. G.Y. and C.K. suggested revisions to the  
259 manuscript. **Competing interests:** The authors declare that they have no competing interests.



.260 **Data and materials availability:** All data needed to evaluate the conclusions in the paper are  
.261 present in the paper. Additional data related to this paper may be requested from the authors.

.262

263 Neural precursors of decisions that matter—an ERP study of deliberate and arbitrary choice

264 Maoz U, Yaffe G, Koch C, and Mudrik L

265 Supplementary Data

266 **Supplementary Table 1: NPO names and causes acronyms**

| NPO                                                                     | Cause                               | NPO website                                                                                                                                         |
|-------------------------------------------------------------------------|-------------------------------------|-----------------------------------------------------------------------------------------------------------------------------------------------------|
| Consensual NPOs                                                         |                                     |                                                                                                                                                     |
| American Society on Aging                                               | Pro Quality of Life for the Elderly | <a href="http://asaging.org/">http://asaging.org/</a>                                                                                               |
| Conservation Fund                                                       | Pro Environment protection          | <a href="http://www.conservationfund.org/">http://www.conservationfund.org/</a>                                                                     |
| Bill & Melinda Gates Foundation                                         | Pro Education                       | <a href="http://www.gatesfoundation.org/">http://www.gatesfoundation.org/</a>                                                                       |
| Global Fund for Women                                                   | Pro Women's Rights                  | <a href="https://www.globalfundforwomen.org/">https://www.globalfundforwomen.org/</a>                                                               |
| The Hunger Project                                                      | Pro Hunger Relief                   | <a href="https://www.thp.org/">https://www.thp.org/</a>                                                                                             |
| Oxfam International                                                     | Pro Poverty & Disaster Relief       | <a href="http://www.oxfam.org/">http://www.oxfam.org/</a>                                                                                           |
| World Wild Life Fund (WWF)                                              | Pro Species Conservation            | <a href="http://worldwildlife.org/">http://worldwildlife.org/</a>                                                                                   |
| Cancer Research Institute                                               | Pro Cancer Research                 | <a href="http://www.cancerresearch.org/">http://www.cancerresearch.org/</a>                                                                         |
| Habitat for Humanity                                                    | Pro Housing for All                 | <a href="http://www.habitat.org/">http://www.habitat.org/</a>                                                                                       |
| Reading is Fundamental                                                  | Pro Advancement of Literacy         | <a href="http://www.rif.org/">http://www.rif.org/</a>                                                                                               |
| International Institute for Conservation of Historic and Artistic Works | Pro Culture & Arts Preservation     | <a href="https://www.iiconservation.org/">https://www.iiconservation.org/</a>                                                                       |
| Big Brothers and Big Sisters of America                                 | Pro Youth Development               | <a href="http://www.bbbs.org/site/c.9iILl3NGKhK6F/b.5962335/k.BE16/Home.htm">http://www.bbbs.org/site/c.9iILl3NGKhK6F/b.5962335/k.BE16/Home.htm</a> |
| United Nations Children's Fund (UNICEF)                                 | Pro Child Protection                | <a href="http://www.unicef.org/">http://www.unicef.org/</a>                                                                                         |
| Doctors without Borders (Medecins sans frontieres)                      | Pro Disaster Medical Care           | <a href="http://www.msf.org/">http://www.msf.org/</a>                                                                                               |
| Soldiers' Angels                                                        | Pro Veterans & Military             | <a href="http://www.soldiersangels.org/heroes/index.php">http://www.soldiersangels.org/heroes/index.php</a>                                         |
| Disability Rights International                                         | Pro Disabilities Rights             | <a href="http://www.disabilityrightsintl.org/">http://www.disabilityrightsintl.org/</a>                                                             |

|                                                        |                                       |                                                                                                             |
|--------------------------------------------------------|---------------------------------------|-------------------------------------------------------------------------------------------------------------|
| National Crime Prevention Council (NCPC)               | Pro Crime Prevention                  | <a href="http://www.ncpc.org/">http://www.ncpc.org/</a>                                                     |
| Amnesty International                                  | Pro Human Rights                      | <a href="https://www.amnesty.org/">https://www.amnesty.org/</a>                                             |
| Peace Corps                                            | Pro Peace & Development               | <a href="http://www.peacecorps.gov/">http://www.peacecorps.gov/</a>                                         |
| World Health Organization                              | Pro World Health                      | <a href="http://www.who.int/en/">http://www.who.int/en/</a>                                                 |
| <b>Controversial NPOs</b>                              |                                       |                                                                                                             |
| Planned Parenthood                                     | Pro Abortion & Family Planning        | <a href="http://www.plannedparenthood.org/">http://www.plannedparenthood.org/</a>                           |
| Pro-Life Alliance                                      | Anti Abortion & Family Planning       | <a href="http://www.prolifealliance.com/">http://www.prolifealliance.com/</a>                               |
| Human Rights Campaign                                  | Pro LBGTQ Rights                      | <a href="http://www.hrc.org/">http://www.hrc.org/</a>                                                       |
| National Organization for Marriage                     | Anti LBGTQ Rights                     | <a href="https://www.nationformarriage.org/">https://www.nationformarriage.org/</a>                         |
| Stem for Life Foundation                               | Pro Stem Cell Research                | <a href="http://www.stemforlife.org/">http://www.stemforlife.org/</a>                                       |
| Christian Dental & Medical Association                 | Anti Stem Cell Research               | <a href="http://www.cmda.org/">http://www.cmda.org/</a>                                                     |
| Greenpeace                                             | Pro Action Against Climate Change     | <a href="http://www.greenpeace.org/international/en/">http://www.greenpeace.org/international/en/</a>       |
| Global Climate Scam                                    | Anti Action Against Climate Change    | <a href="http://www.globalclimatescam.com/">http://www.globalclimatescam.com/</a>                           |
| National Association for Gun Rights                    | Pro Gun Rights                        | <a href="http://www.nationalgunrights.org/">http://www.nationalgunrights.org/</a>                           |
| Coalition to Stop Gun Violence                         | Pro Gun Control                       | <a href="http://csgv.org/">http://csgv.org/</a>                                                             |
| American Gas Association                               | Pro Fracking for Natural Gas          | <a href="http://www.aga.org/Pages/default.aspx">http://www.aga.org/Pages/default.aspx</a>                   |
| Americans Against Fracking                             | Anti Fracking for Natural Gas         | <a href="http://www.americansagainstfracking.org/">http://www.americansagainstfracking.org/</a>             |
| StandWithUs (Israel)                                   | Pro Israel                            | <a href="http://www.standwithus.com/">http://www.standwithus.com/</a>                                       |
| Palestinian Centre for Human Rights                    | Pro Palestine                         | <a href="http://www.pchrgaza.org/portal/en/">http://www.pchrgaza.org/portal/en/</a>                         |
| National Organization for the Reform of Marijuana Laws | Pro Marijuana Legalization            | <a href="http://norml.org/">http://norml.org/</a>                                                           |
| Citizens Against Legalizing Marijuana                  | Anti Marijuana Legalization           | <a href="http://www.calmca.org/">http://www.calmca.org/</a>                                                 |
| Understanding Animal Research                          | Pro Scientific Experiments on Animals | <a href="http://www.understandinganimalresearch.org.uk/">http://www.understandinganimalresearch.org.uk/</a> |

|                                                                  |                                        |                                                                                     |
|------------------------------------------------------------------|----------------------------------------|-------------------------------------------------------------------------------------|
| International Association Against Painful Experiments on Animals | Anti Scientific Experiments on Animals | <a href="http://www.iaapea.com/">http://www.iaapea.com/</a>                         |
| Federation for American Immigration Reform                       | Pro Immigration Reform                 | <a href="http://www.fairus.org/">http://www.fairus.org/</a>                         |
| American Immigration Control                                     | Anti Immigration Reform                | <a href="http://www.immigrationcontrol.com/">http://www.immigrationcontrol.com/</a> |
| Human Cloning Foundation                                         | Pro Human Cloning                      | <a href="http://www.humancloning.org/">http://www.humancloning.org/</a>             |
| Americans to Ban Cloning                                         | Anti Human Cloning                     | <a href="http://www.cloninginformation.org/">http://www.cloninginformation.org/</a> |
| Americans United for Separation of Church and State              | Pro Separation of Church & State       | <a href="https://www.au.org/">https://www.au.org/</a>                               |
| Christian Coalition of America                                   | Anti Separation of Church & State      | <a href="http://www.cc.org/">http://www.cc.org/</a>                                 |
| Death with Dignity National Center                               | Pro Euthanasia (Assisted Suicide)      | <a href="http://www.deathwithdignity.org/">http://www.deathwithdignity.org/</a>     |
| Euthanasia Prevention Coalition                                  | Anti Euthanasia (Assisted Suicide)     | <a href="http://www.epcc.ca/">http://www.epcc.ca/</a>                               |
| The Alliance for Better Foods                                    | Pro Genetically Modified Foods         | <a href="http://www.betterfoods.org/">http://www.betterfoods.org/</a>               |
| Non-GMO Project                                                  | Anti Genetically Modified Foods        | <a href="http://www.nongmoproject.org/">http://www.nongmoproject.org/</a>           |
| Answers in Genesis                                               | Pro Creationism Teaching               | <a href="https://answersingenesis.org">https://answersingenesis.org</a>             |
| National Center for Science Education                            | Pro Evolution Teaching                 | <a href="http://ncse.com/">http://ncse.com/</a>                                     |
